# Integrating genotypes and phenotypes improves long-term forecasts of seasonal influenza A/H3N2 evolution

John Huddleston<sup>1,2</sup>, John R. Barnes<sup>3</sup>, Thomas Rowe<sup>3</sup>, Xiyan Xu<sup>3</sup>, Rebecca Kondor<sup>3</sup>, David E. Wentworth<sup>3</sup>, Lynne Whittaker<sup>4</sup>, Burcu Ermetal<sup>4</sup>, Rodney S. Daniels<sup>4</sup>, John W. McCauley<sup>4</sup>, Seiichiro Fujisaki<sup>5</sup>, Kazuya Nakamura<sup>5</sup>, Noriko Kishida<sup>5</sup>, Shinji Watanabe<sup>5</sup>, Hideki Hasegawa<sup>5</sup>, Ian Barr<sup>6</sup>, Kanta Subbarao<sup>6</sup>, Richard A. Neher<sup>7,8</sup> & Trevor Bedford<sup>1</sup>

<sup>1</sup>Vaccine and Infectious Disease Division, Fred Hutchinson Cancer Research Center, Seattle, WA, USA, <sup>2</sup>Molecular and Cell Biology, University of Washington, Seattle, WA, USA, <sup>3</sup>Virology Surveillance and Diagnosis Branch, Influenza Division, National Center for Immunization and Respiratory Diseases (NCIRD), Centers for Disease Control and Prevention (CDC), 1600 Clifton Road, Atlanta, GA 30333, USA, <sup>4</sup>WHO Collaborating Centre for Reference and Research on Influenza, Crick Worldwide Influenza Centre, The Francis Crick Institute, London, UK., <sup>5</sup>Influenza Virus Research Center, National Institute of Infectious Diseases, Tokyo, Japan, <sup>6</sup>The WHO Collaborating Centre for Reference and Research on Influenza, The Peter Doherty Institute for Infection and Immunity, Melbourne, VIC, Australia; Department of Microbiology and Immunology, The University of Melbourne, The Peter Doherty Institute for Infection and Immunity, Melbourne, VIC, Australia., <sup>7</sup>Biozentrum, University of Basel, Basel, Switzerland, <sup>8</sup>Swiss Institute of Bioinformatics, Basel, Switzerland

## Abstract

Seasonal influenza virus A/H3N2 is a major cause of death globally. Vaccination remains the most effective preventative. Rapid mutation of hemagglutinin allows viruses to escape adaptive immunity. This antigenic drift necessitates regular vaccine updates. Effective vaccine strains need to represent H3N2 populations circulating one year after strain selection. Experts select strains based on experimental measurements of antigenic drift and predictions made by models from hemagglutinin sequences. We developed a novel influenza forecasting framework that integrates phenotypic measures of antigenic drift and functional constraint with previously published sequence-only fitness estimates. Forecasts informed by phenotypic measures of antigenic drift consistently outperformed previous sequence-only estimates, while sequence-only estimates of functional constraint surpassed more comprehensive experimentally-informed estimates. Importantly, the best models integrated estimates of both functional constraint and either antigenic drift phenotypes or recent population growth.

## 33 Introduction

34 Seasonal influenza virus infects 5–15% of the global population every year causing an estimated  
35 250,000 to 500,000 deaths annually with the majority of infections caused by influenza A/H3N2 [1].  
36 Vaccination remains the most effective public health response available. However, frequent viral  
37 mutation results in viruses that escape previously acquired human immunity. The World Health  
38 Organization (WHO) Global Influenza Surveillance and Response System (GISRS) selects  
39 vaccine viruses to represent circulating viruses, but because the process of vaccine development  
40 and distribution requires several months to complete, optimal vaccine design requires an accurate  
41 prediction of which viruses will predominate approximately one year after vaccine viruses are  
42 selected. Current vaccine predictions focus on the hemagglutinin (HA) protein, which acts as  
43 the primary target of human immunity. Until recently, the hemagglutination inhibition (HI)  
44 assay has been the primary experimental measure of antigenic cross-reactivity between pairs  
45 of circulating viruses [2]. Most modern H3N2 strains carry a glycosylation motif that reduces  
46 their binding efficiency in HI assays [3,4], prompting the increased use of virus neutralization  
47 assays including the neutralization-based focus reduction assay (FRA) [5]. Together, these two  
48 assays are the gold standard in virus antigenic characterizations for vaccine strain selection,  
49 but they are laborious and low-throughput compared to genome sequencing [6]. As a result,  
50 researchers have developed computational methods to predict influenza evolution from sequence  
51 data alone [7–9].

52 Despite the promise of these sequence-only models, they explicitly omit experimental measure-  
53 ments of antigenic or functional phenotypes. Recent developments in computational methods  
54 and influenza virology have made it feasible to integrate these important metrics of influenza  
55 fitness into a single predictive model. For example, phenotypic measurements of antigenic drift  
56 are now accessible through phylogenetic models [10] and functional phenotypes for HA are  
57 available from deep mutational scanning (DMS) experiments [11]. We describe an approach to  
58 integrate previously disparate sequence-only models of influenza evolution with high-quality  
59 experimental measurements of antigenic drift and functional constraint.

60 The influenza community has long recognized the importance of incorporating HI phenotypes  
61 and other experimental measurements of viral phenotypes with existing forecasting methods  
62 to inform the vaccine design process [12–14]. Although several distinct efforts have made  
63 progress in using HI phenotypes to evaluate the evolution of seasonal influenza [8,10], published  
64 methods stop short of developing a complete forecasting framework wherein the evolutionary  
65 contribution of HI phenotypes can be compared and contrasted with new and existing fitness  
66 metrics. However, unpublished work by Łuksza and Lässig submitted to the WHO GISRS  
67 network incorporates antigenic phenotypes into fitness-based predictions [13,15]. Here, we  
68 provide an open source framework for forecasting the genetic composition of future seasonal  
69 influenza populations using genotypic and phenotypic fitness estimates. We apply this framework  
70 to HA sequence data shared via the GISAID EpiFlu database [16] and to HI and FRA titer  
71 data shared by WHO GISRS Collaborating Centers in London, Melbourne, Atlanta and Tokyo.  
72 We systematically compare potential predictors and show that HI phenotypes enable more  
73 accurate long-term forecasts of H3N2 populations compared to previous metrics based on epitope  
74 mutations alone. We also find that composite models based on phenotypic measures of antigenic

75 drift and genotypic measures of functional constraint consistently outperform any fitness models  
76 based on individual genotypic or phenotypic metrics.

## 77 Results

### 78 A distance-based model of seasonal influenza evolution

79 We developed a framework to forecast seasonal influenza evolution inspired by the Malthusian  
80 growth fitness model of Łuksza and Lässig [7]. As with this original model, we forecasted  
81 the frequencies of viral populations one year in advance by applying to each virus strain an  
82 exponential growth factor scaled by an estimate of the strain’s fitness (Fig. 1 and Eq. 1). We  
83 estimated the frequency of virus strains every six months using kernel density estimation (KDE).

84 We estimated viral fitness with biologically-informed metrics including those originally defined by  
85 Łuksza and Lässig [7] of epitope antigenic novelty and mutational load (non-epitope mutations) as  
86 well as four more recent metrics including hemagglutination inhibition (HI) antigenic novelty [10],  
87 deep mutational scanning (DMS) mutational effects [11], local branching index (LBI) [9], and  
88 change in clade frequency over time (delta frequency). All of these metrics except for HI antigenic  
89 novelty and DMS mutational effects rely only on HA sequences. The antigenic novelty metrics  
90 estimate how antigenically distinct each strain at time  $t$  is from previously circulating strains  
91 based on either genetic distance at epitope sites or  $\log_2$  titer distance from HI measurements.  
92 Increased antigenic drift relative to previously circulating strains is expected to correspond to  
93 increased viral fitness. Mutational load estimates functional constraint by measuring the number  
94 of putatively deleterious mutations that have accumulated in each strain since their ancestor in  
95 the previous season. DMS mutational effects provide a more comprehensive biophysical model  
96 of functional constraint by measuring the beneficial or deleterious effect of each possible single  
97 amino acid mutation in HA from the background of a previous vaccine strain, A/Perth/16/2009.  
98 The growth metrics estimate how successful populations of strains have been in the last six  
99 months based on either rapid branching in the phylogeny (LBI) or the change in clade frequencies  
100 over time (delta frequency).

101 We fit models for individual fitness metrics and combinations of metrics that we anticipated  
102 would be mutually beneficial. For each model, we learned coefficient(s) that minimized the earth  
103 mover’s distance between HA amino acid sequences from the observed population one year in  
104 the future and the estimated population produced by the fitness model (Fig. 1 and Eq. 2). We  
105 evaluated model performance with time-series cross-validation such that better models reduced  
106 the earth mover’s distance to the future on validation or test data (Supplemental Figs S1 and  
107 S8). The earth mover’s distance to the future can never be zero, because each model makes  
108 predictions based on sequences available at the time of prediction and cannot account for new  
109 mutations that occur during the prediction interval. We calculated the lower bound for each  
110 model’s performance as the optimal distance to the future possible given the current sequences  
111 at each timepoint. As an additional reference, we evaluated the performance of a “naive” model  
112 that predicted the future population would be identical to the current population. We expected

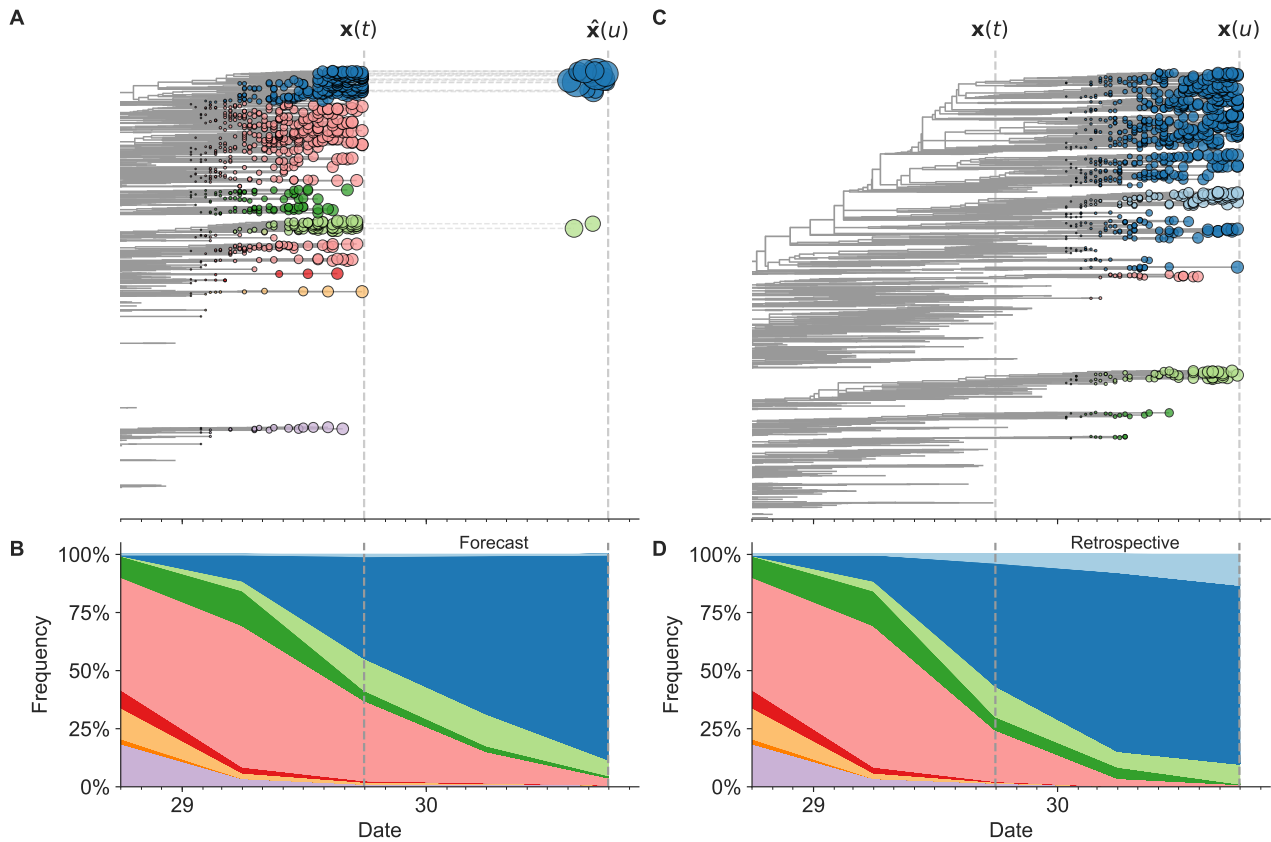

**Figure 1.** Schematic representation of the fitness model for simulated H3N2-like populations wherein the fitness of strains at timepoint  $t$  determines the estimated frequency of strains with similar sequences one year in the future at timepoint  $u$ . Strains are colored by their amino acid sequence composition such that genetically similar strains have similar colors (Methods). A) Strains at timepoint  $t$ ,  $\mathbf{x}(t)$ , are shown in their phylogenetic context and sized by their frequency at that timepoint. The estimated future population at timepoint  $u$ ,  $\hat{\mathbf{x}}(u)$ , is projected to the right with strains scaled in size by their projected frequency based on the known fitness of each simulated strain. B) The frequency trajectories of strains at timepoint  $t$  to  $u$  represent the predicted the growth of the dark blue strains to the detriment of the pink strains. C) Strains at timepoint  $u$ ,  $\mathbf{x}(u)$ , are shown in the corresponding phylogeny for that timepoint and scaled by their frequency at that time. D) The observed frequency trajectories of strains at timepoint  $u$  broadly recapitulate the model's forecasts while also revealing increased diversity of sequences at the future timepoint that the model could not anticipate, e.g. the emergence of the light blue cluster from within the successful dark blue cluster. Model coefficients minimize the earth mover's distance between amino acid sequences in the observed,  $\mathbf{x}(u)$ , and estimated,  $\hat{\mathbf{x}}(u)$ , future populations across all training windows.

113 that the best models would consistently outperform the naive model and perform as close as  
114 possible to the lower bound.

## 115 Models accurately forecast evolution of simulated H3N2-like viruses

116 The long-term evolution of influenza H3N2 hemagglutinin has been previously described as a  
117 balance between positive selection for substitutions that enable escape from adaptive immunity  
118 by modifying existing epitopes and purifying selection on domains that are required to maintain  
119 the protein's primary functions of binding and membrane fusion [7, 17–19]. To test the ability  
120 of our models to accurately detect these evolutionary patterns under controlled conditions, we  
121 simulated the long-term evolution of H3N2-like viruses under positive and purifying selection for  
122 40 years (Methods, Supplemental Fig. S1). These selective constraints produced phylogenetic  
123 structures and accumulation of epitope and non-epitope mutations that were consistent with  
124 phylogenies of natural H3N2 HA (Supplemental Fig. S2, Supplemental Tables S1 and S2). We  
125 fit models to these simulated populations using all sequence-only fitness metrics. As a positive  
126 control for our model framework, we also fit a model based on the true fitness of each strain as  
127 measured by the simulator.

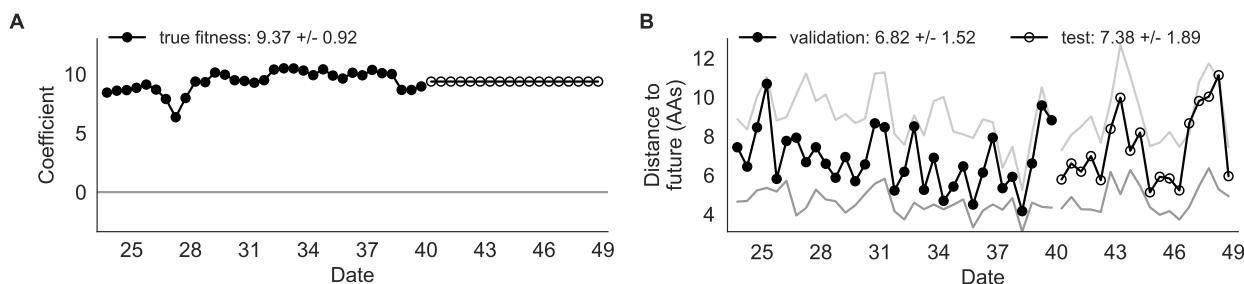

**Figure 2.** Simulated population model coefficients and distances between projected and observed future populations as measured in amino acids (AAs). A) Coefficients are shown per validation timepoint (solid circles, N=33) with the mean  $\pm$  standard deviation in the top-left corner. For model testing, coefficients were fixed to their mean values from training/validation and applied to out-of-sample test data (open circles, N=18). B) Distances between projected and observed populations are shown per validation timepoint (solid black circles) or test timepoint (open black circles). The mean  $\pm$  standard deviation of distances per validation timepoint are shown in the top-left of each panel. Corresponding values per test timepoint are in the top-right. The naive model's distances to the future for validation and test timepoints (light gray) were  $8.97 \pm 1.35$  AAs and  $9.07 \pm 1.70$  AAs, respectively. The corresponding lower bounds on the estimated distance to the future (dark gray) were  $4.57 \pm 0.61$  AAs and  $4.85 \pm 0.82$  AAs.

128 We hypothesized that fitness metrics associated with viral success such as true fitness, epitope  
129 antigenic novelty, LBI, and delta frequency would be assigned positive coefficients, while metrics  
130 associated with fitness penalties, like mutational load, would receive negative coefficients. We  
131 reasoned that both LBI and delta frequency would individually outperform the mechanistic  
132 metrics as both of these growth metrics estimate recent clade success regardless of the mechanistic  
133 basis for that success. Correspondingly, we expected that a composite model of epitope antigenic  
134 novelty and mutational load would perform as well as or better than the growth metrics, as this  
135 model would include both primary fitness constraints acting on our simulated populations.

136 As expected, the true fitness model outperformed all other models, estimating a future population

| Model                     | Coefficients   | Distance to future (AAs) |                | Model > naive |           |
|---------------------------|----------------|--------------------------|----------------|---------------|-----------|
|                           |                | Validation               | Test           | Validation    | Test      |
| true fitness              | 9.37 +/- 0.92  | 6.82 +/- 1.52*           | 7.38 +/- 1.89* | 32 (97%)      | 16 (89%)  |
| LBI                       | 1.31 +/- 0.33  | 7.24 +/- 1.66*           | 7.10 +/- 1.19* | 32 (97%)      | 18 (100%) |
| + mutational load         | -1.77 +/- 0.49 |                          |                |               |           |
| LBI                       | 2.26 +/- 1.06  | 7.57 +/- 1.85*           | 7.51 +/- 1.20* | 29 (88%)      | 17 (94%)  |
| delta frequency           | 1.46 +/- 0.44  | 8.13 +/- 1.44*           | 8.65 +/- 1.99* | 26 (79%)      | 13 (72%)  |
| epitope ancestor          | 0.35 +/- 0.07  | 8.20 +/- 1.39*           | 8.17 +/- 1.52* | 29 (88%)      | 17 (94%)  |
| + mutational load         | -1.57 +/- 0.13 |                          |                |               |           |
| mutational load           | -1.49 +/- 0.12 | 8.27 +/- 1.35*           | 8.20 +/- 1.50* | 29 (88%)      | 17 (94%)  |
| epitope antigenic novelty | 0.03 +/- 0.19  | 8.33 +/- 1.35*           | 8.22 +/- 1.51* | 28 (85%)      | 17 (94%)  |
| + mutational load         | -1.38 +/- 0.39 |                          |                |               |           |
| epitope ancestor          | 0.14 +/- 0.11  | 8.96 +/- 1.35            | 9.03 +/- 1.68* | 20 (61%)      | 13 (72%)  |
| naive                     | 0.00 +/- 0.00  | 8.97 +/- 1.35            | 9.07 +/- 1.70  | 0 (0%)        | 0 (0%)    |
| epitope antigenic novelty | -0.03 +/- 0.19 | 9.03 +/- 1.37            | 9.07 +/- 1.69  | 14 (42%)      | 7 (39%)   |

**Table 1.** Simulated population model coefficients and performance on validation and test data ordered from best to worst by distance to the future in the validation analysis. Coefficients are the mean  $\pm$  standard deviation for each metric in a given model across 33 training windows. Distance to the future (mean  $\pm$  standard deviation) measures the distance in amino acids between estimated and observed future populations. Distances annotated with asterisks (\*) were significantly closer to the future than the naive model as measured by bootstrap tests (see Methods and Supplemental Fig. S4). The number of times (and percentage of total times) each model outperformed the naive model measures the benefit of each model over a model than estimates no change between current and future populations. Test results are based on 18 timepoints not observed during model training and validation.

137 within  $6.82 \pm 1.52$  amino acids (AAs) of the observed future and surpassing the naive model in  
 138 32 (97%) of 33 timepoints (Fig. 2, Table 1). Although the true fitness model performed better  
 139 than the naive model’s average distance of  $8.97 \pm 1.35$  AAs, it did not reach the closest possible  
 140 distance between populations of  $4.57 \pm 0.61$  AAs. With the exception of epitope antigenic  
 141 novelty, all biologically-informed models consistently outperformed the naive model (Fig. 3,  
 142 Table 1). LBI was the best of these models, with a distance to the future of  $7.57 \pm 1.85$  AAs.  
 143 This result is consistent with the fact that the LBI is a correlate of fitness in models of rapidly  
 144 adapting populations [9]. Indeed, both growth-based models received positive coefficients and  
 145 outperformed the mechanistic models. The mutational load metric received a consistently  
 146 negative coefficient with an average distance of  $8.27 \pm 1.35$  AAs.

147 Surprisingly, the composite model of epitope antigenic novelty and mutational load did not  
 148 perform better than the individual mutational load model (Supplemental Fig. S3). The antigenic  
 149 novelty fitness metric assumes that antigenic drift is driven by nonlinear effects of previous  
 150 host exposure [7] that are not explicitly present in our simulations. To understand whether  
 151 positive selection at epitope sites might be better represented by a linear model, we fit an  
 152 additional model based on an “epitope ancestor” metric that counted the number of epitope  
 153 mutations since each strain’s ancestor in the previous season. This linear fitness metric slightly  
 154 outperformed the antigenic novelty metric (Table 1). Importantly, a composite model of the

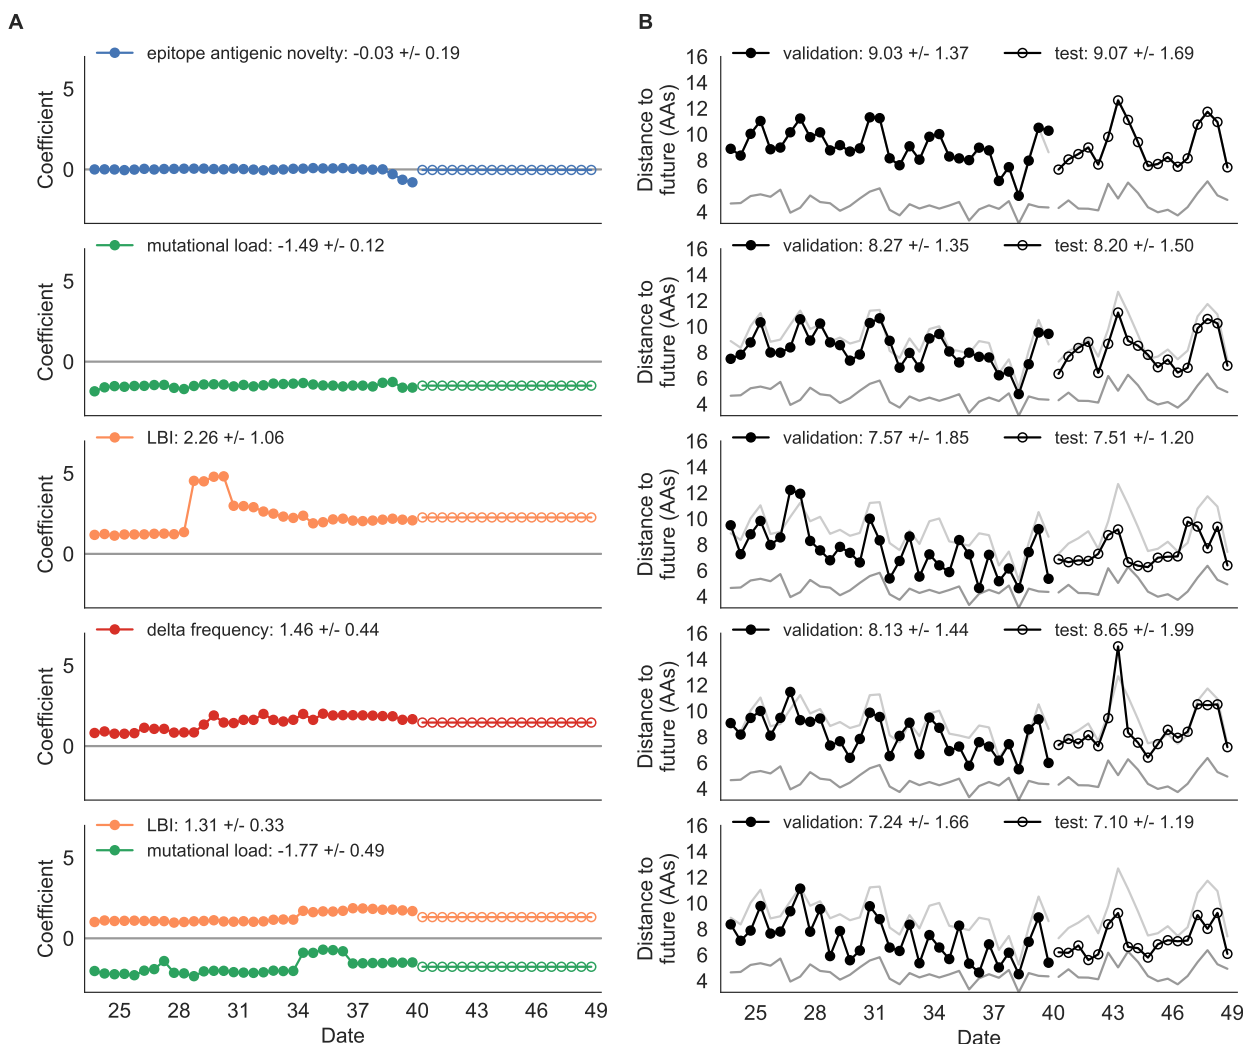

**Figure 3.** Simulated population model coefficients and distances to the future for individual biologically-informed fitness metrics and the best composite model. A) Coefficients and B) distances are shown per validation and test timepoint as in Fig. 2.

155 epitope ancestor and mutational load metrics outperformed all other epitope-based models and  
 156 the individual mutational load model (Supplemental Fig. S3). From these results, we concluded  
 157 that our method can accurately estimate the evolution of simulated populations, but that the  
 158 fitness of simulated strains was dominated by purifying selection and only weakly affected by a  
 159 linear effect of positive selection at epitope sites.

160 We hypothesized that a composite model of mutually beneficial metrics could better approximate  
 161 the true fitness of simulated viruses than models based on individual metrics. To this end, we fit  
 162 an additional model including the best metrics from the mechanistic and clade growth categories:  
 163 mutational load and LBI. This composite model outperformed both of its corresponding  
 164 individual metric models with an average distance to the future of  $7.24 \pm 1.66$  AAs and  
 165 outperformed the naive model as often as the true fitness metric (Fig. 3, Table 1, Supplemental

166 Table S4). The coefficients for mutational load and LBI remained relatively consistent across all  
167 validation timepoints, indicating that these fitness metrics were stable approximations of the  
168 simulator’s underlying evolutionary processes. This small gain supports our hypothesis that  
169 multiple complementary metrics can produce more accurate models.

170 We validated the best performing model (true fitness) using two metrics that are relevant for  
171 practical influenza forecasting and vaccine design efforts. First, we measured the ability of the  
172 true fitness model to accurately estimate dynamics of large clades (initial frequency > 15%) by  
173 comparing observed fold change in clade frequencies,  $\log_{10} \frac{x(t+\Delta t)}{x(t)}$  and estimated fold change,  
174  $\log_{10} \frac{\hat{x}(t+\Delta t)}{x(t)}$ . The model’s estimated fold changes correlated well with observed fold changes  
175 (Pearson’s  $R^2 = 0.52$ , Supplemental Fig. S5A). The model also accurately predicted the growth  
176 of 87% of growing clades and the decline of 58% of declining clades. Model forecasts were  
177 increasingly more accurate with increasing initial clade frequencies (Supplemental Fig. S5C).  
178 Next, we counted how often the estimated closest strain to the future population at any given  
179 timepoint ranked among the observed top closest strains to the future. The estimated best strain  
180 was in the top first percentile of observed closest strains for half of the validation timepoints  
181 and in the top 20th percentile for 100% of timepoints (Supplemental Fig. S5B). Percentile ranks  
182 per strain based on their observed and estimated distances to the future correlated strongly  
183 across all strains and timepoints (Spearman’s  $\rho^2 = 0.87$ , Supplemental Fig. S5D).

184 Finally, we tested all of our models on out-of-sample data. Specifically, we fixed the coefficients  
185 of each model to the average values across the validation period and applied the resulting  
186 models to the next 9 years of previously unobserved simulated data. A standard expectation  
187 from machine learning is that models will perform worse on test data due to overfitting to  
188 training data. Despite this expectation, we found that all models except for the individual  
189 epitope mutation models consistently outperformed the naive model across the out-of-sample  
190 data (Fig. 2, Fig. 3, Supplemental Fig. S3, Table 1). The composite model of mutational load  
191 and LBI appeared to outperform the true fitness metric with average distance to the future  
192 of  $7.10 \pm 1.19$  compared to  $7.38 \pm 1.89$ , respectively. However, we did not find a significant  
193 difference between these models by bootstrap testing (Supplemental Table S4) and could not  
194 rule out fluctuations in model performance across a relatively small number of data points.

195 As with our validation dataset, we tested the true fitness model’s ability to recapitulate clade  
196 dynamics and select optimal individual strains from the test data. While observed and estimated  
197 clade frequency fold changes correlated more weakly for test data (Pearson’s  $R^2 = 0.14$ ), the  
198 accuracies of clade growth and decline predictions remained similar at 82% and 53%, respectively  
199 (Fig. 4A). We observed higher absolute forecast errors in the test data with higher errors for clades  
200 between 40% and 60% initial frequencies (Supplemental Fig. 4C). The estimated best strain was  
201 higher than the top first percentile of observed closest strains for half of the test timepoints and in  
202 the top 20th percentile for 16 (89%) of 18 of timepoints (Fig. 4B). Observed and estimated strain  
203 ranks remained strongly correlated across all strains and timepoints (Spearman’s  $\rho^2 = 0.80$ ,  
204 Fig. 4D). These results confirm that our approach of minimizing the distance between yearly  
205 populations can simultaneously capture clade-level dynamics of simulated influenza populations  
206 and identify individual strains that are most representative of future populations.



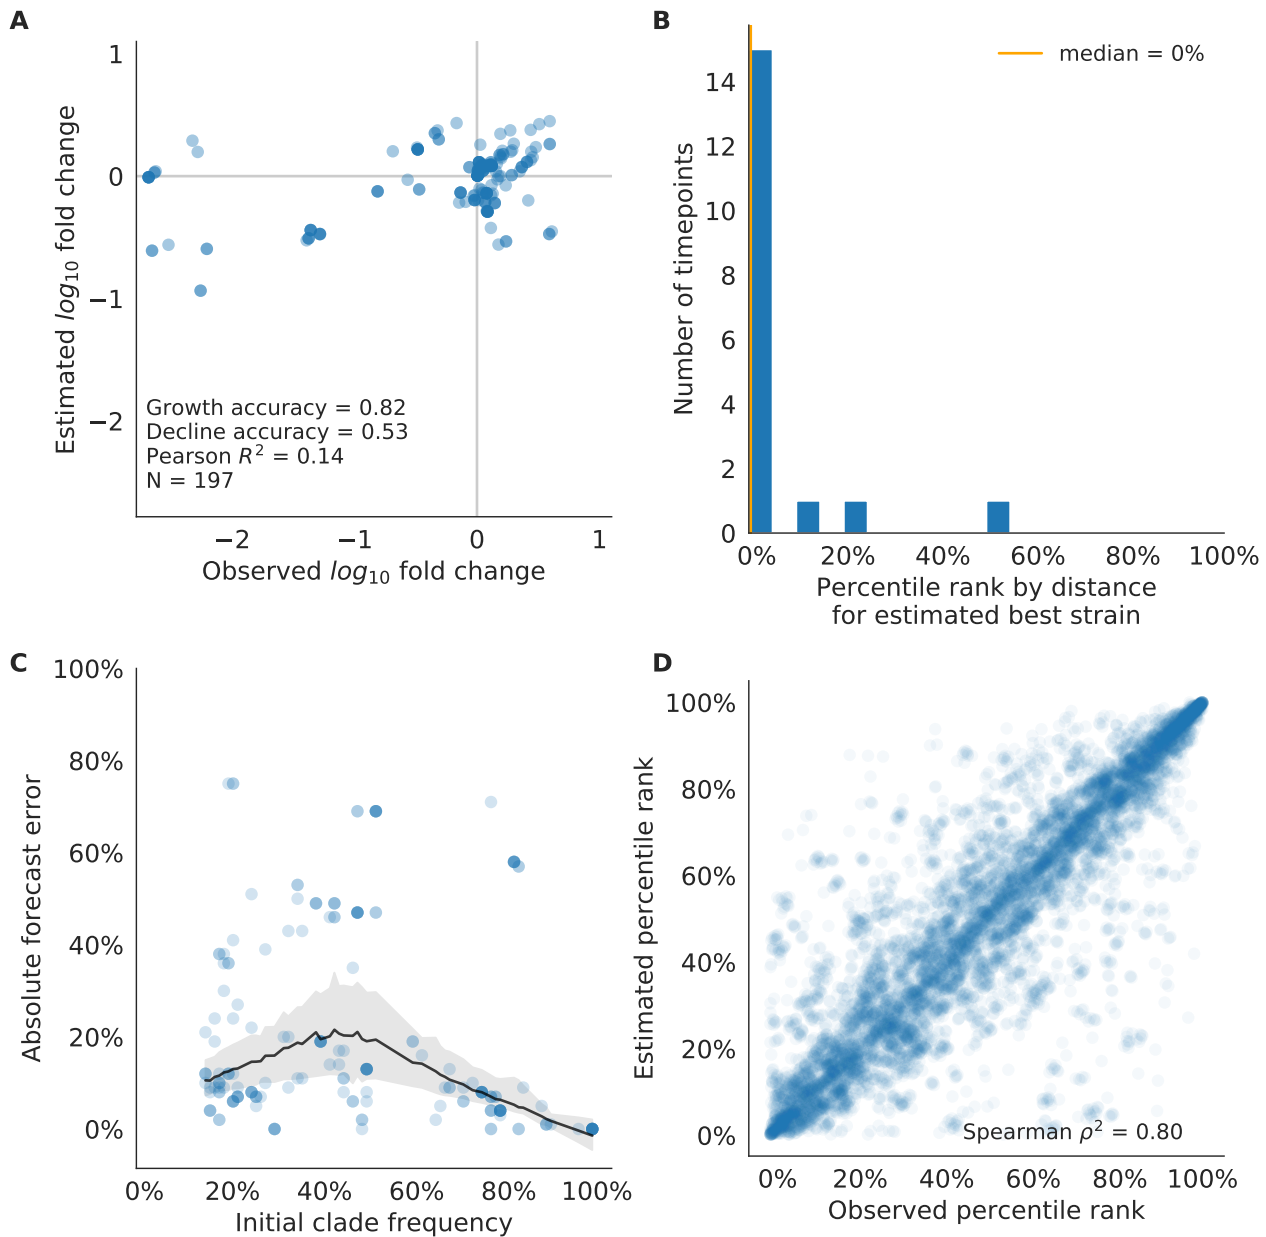

**Figure 4.** Test of best model for simulated populations (true fitness) using 9 years previously unobserved test data and fixed model coefficients. A) The correlation of log estimated clade frequency fold change,  $\log_{10} \frac{\hat{x}(t+\Delta t)}{x(t)}$ , and log observed clade frequency fold change,  $\log_{10} \frac{x(t+\Delta t)}{x(t)}$ , shows the model’s ability to capture clade-level dynamics without explicitly optimizing for clade frequency targets. B) The rank of the estimated best strain based on its distance to the future in the best model was in the top 20th percentile for 89% of 18 timepoints, confirming that the model makes a good choice when forced to select a single representative strain for the future population. C) Absolute forecast error for clades shown in A by their initial frequency with a mean LOESS fit (solid black line) and 95% confidence intervals (gray shading) based on 100 bootstraps. D) The correlation of all strains at all timepoints by the percentile rank of their observed and estimated distances to the future. The corresponding results for the naive model are shown in Supplemental Fig. S7.

## 207 Models reflect historical patterns of H3N2 evolution

| Model                     | Coefficients   | Distance to future (AAs) |                | Model > naive |         |
|---------------------------|----------------|--------------------------|----------------|---------------|---------|
|                           |                | Validation               | Test           | Validation    | Test    |
| mutational load           | -0.68 +/- 0.34 | 5.44 +/- 1.80*           | 7.70 +/- 3.53  | 18 (78%)      | 4 (50%) |
| + LBI                     | 1.03 +/- 0.40  |                          |                |               |         |
| LBI                       | 1.12 +/- 0.51  | 5.68 +/- 1.91*           | 8.40 +/- 3.97  | 17 (74%)      | 2 (25%) |
| HI antigenic novelty      | 0.89 +/- 0.23  | 5.82 +/- 1.50*           | 5.97 +/- 1.47* | 17 (74%)      | 6 (75%) |
| + mutational load         | -1.01 +/- 0.42 |                          |                |               |         |
| HI antigenic novelty      | 0.90 +/- 0.23  | 5.84 +/- 1.51*           | 5.99 +/- 1.46* | 16 (70%)      | 6 (75%) |
| + mutational load         | -1.00 +/- 0.44 |                          |                |               |         |
| + LBI                     | -0.04 +/- 0.09 |                          |                |               |         |
| HI antigenic novelty      | 0.83 +/- 0.20  | 6.01 +/- 1.50*           | 6.21 +/- 1.44* | 16 (70%)      | 7 (88%) |
| delta frequency           | 0.79 +/- 0.47  | 6.13 +/- 1.71*           | 6.90 +/- 2.30  | 16 (70%)      | 5 (62%) |
| mutational load           | -0.99 +/- 0.30 | 6.14 +/- 1.37*           | 6.53 +/- 1.39  | 17 (74%)      | 6 (75%) |
| naive                     | 0.00 +/- 0.00  | 6.40 +/- 1.36            | 6.82 +/- 1.74  | 0 (0%)        | 0 (0%)  |
| DMS mutational effects    | 1.25 +/- 0.84  | 6.75 +/- 1.95            | 7.80 +/- 2.97  | 11 (48%)      | 4 (50%) |
| epitope antigenic novelty | 0.52 +/- 0.73  | 7.13 +/- 1.47            | 6.70 +/- 1.51  | 7 (30%)       | 5 (62%) |

**Table 2.** Natural population model coefficients and performance on validation and test data ordered from best to worst by distance to the future in the validation analysis, as in Table 1. Distances annotated with asterisks (\*) were significantly closer to the future than the naive model as measured by bootstrap tests (see Methods and Supplemental Fig. S10). Validation results are based on 23 timepoints. Test results are based on eight timepoints not observed during model training and validation.

208 Next, we trained and validated models for individual fitness predictors using 25 years of natural  
 209 H3N2 populations spanning from October 1, 1990 to October 1, 2015. We held out strains  
 210 collected after October 1, 2015 up through October 1, 2019 for model testing (Supplemental  
 211 Fig. S8). In addition to the sequence-only models we tested on simulated populations, we also  
 212 fit models for our new fitness metrics based on experimental phenotypes including HI antigenic  
 213 novelty and DMS mutational effects. We hypothesized that both HI and DMS metrics would be  
 214 assigned positive coefficients, as they estimate increased antigenic drift and beneficial mutations,  
 215 respectively. As antigenic drift is generally considered to be the primary evolutionary pressure  
 216 on natural H3N2 populations [7, 20, 21], we expected that epitope and HI antigenic novelty  
 217 would be individually more predictive than mutational load or DMS mutational effects. Previous  
 218 research [9] and our simulation results also led us to expect that LBI and delta frequency would  
 219 outperform other individual mechanistic metrics. As the earliest measurements from focus  
 220 reduction assays (FRAs) date back to 2012, we could not train, validate, and test FRA antigenic  
 221 novelty models in parallel with the HI antigenic novelty models.

222 Biologically-informed metrics generally performed better than the naive model with the excep-  
 223 tions of the epitope antigenic novelty and DMS mutational effects (Fig. 5 and Table 2). The  
 224 naive model estimated an average distance between natural H3N2 populations of  $6.40 \pm 1.36$   
 225 AAs. The lower bound for how well any model could perform,  $2.60 \pm 0.89$  AAs, was considerably  
 226 lower than the corresponding bounds for simulated populations. The average improvement of  
 227 the sequence-only models over the naive model was consistently lower than the same models in

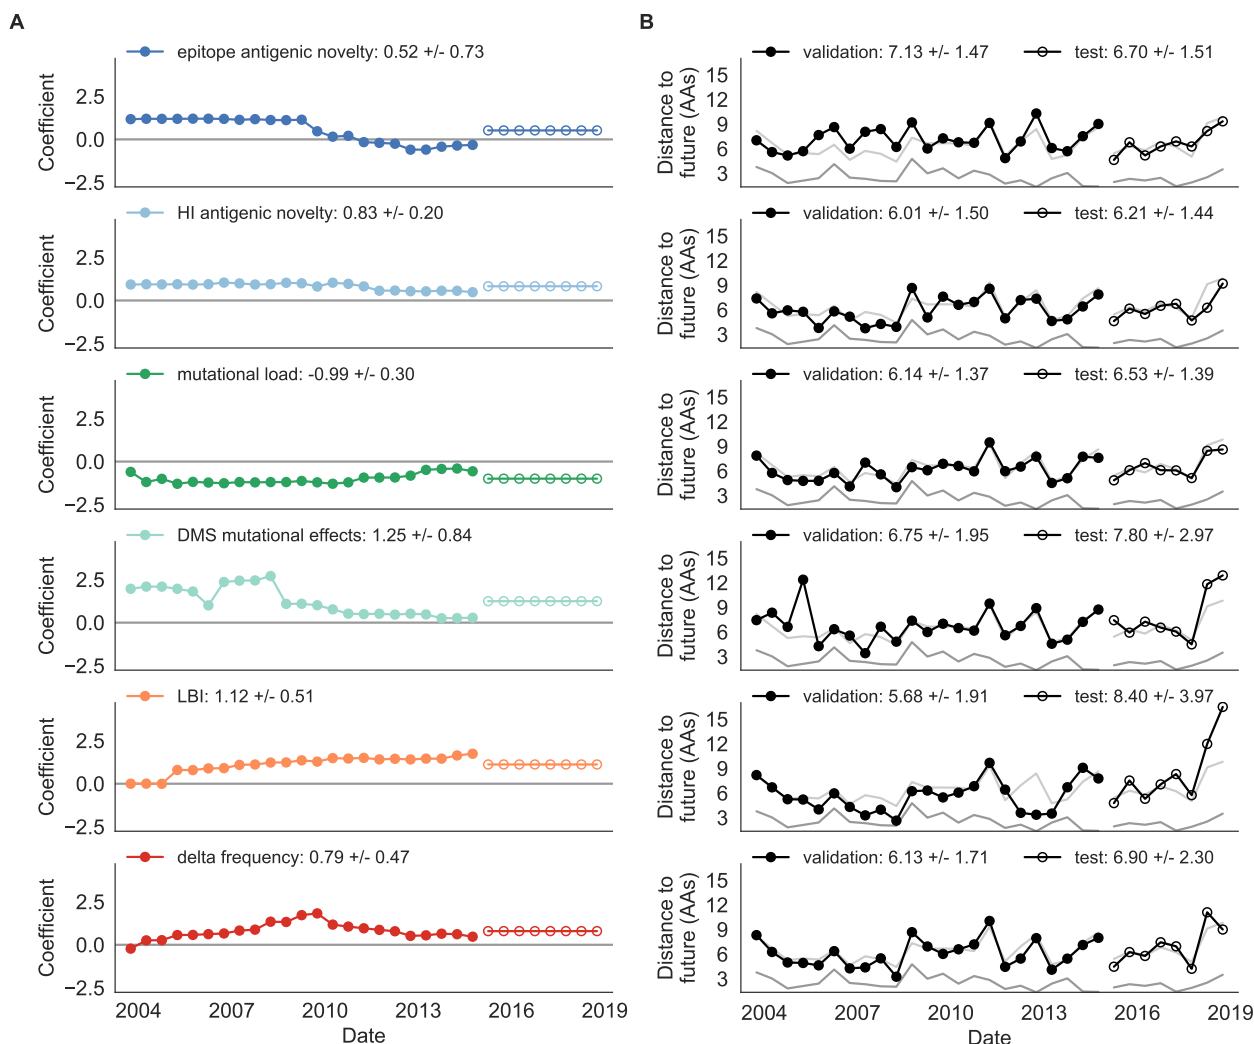

**Figure 5.** Natural population model coefficients and distances to the future for individual biologically-informed fitness metrics. A) Coefficients and B) distances are shown per validation timepoint (N=23) and test timepoint (N=8) as in Fig. 2. The naive model’s distance to the future (light gray) was  $6.40 \pm 1.36$  AAs for validation timepoints and  $6.82 \pm 1.74$  AAs for test timepoints. The corresponding lower bounds on the estimated distance to the future (dark gray) were  $2.60 \pm 0.89$  AAs and  $2.28 \pm 0.61$  AAs.

228 simulated populations. This reduced performance may have been caused by both the relatively  
 229 reduced diversity between years in natural populations and the fact that our simple models do  
 230 not capture all drivers of evolution in natural H3N2 populations.

231 Of the two metrics for antigenic drift, HI antigenic novelty consistently outperformed epitope  
 232 antigenic novelty (Table 2). HI antigenic novelty estimated an average distance to the future  
 233 of  $6.01 \pm 1.50$  AAs and outperformed the naive model at 16 of 23 timepoints (70%). The  
 234 coefficient for HI antigenic novelty remained stable across all timepoints (Fig. 5). In contrast,  
 235 epitope antigenic novelty estimated a distance of  $7.13 \pm 1.47$  AAs and only outperformed the

236 naive model at seven timepoints (30%). Epitope antigenic novelty was also the only metric  
237 whose coefficient started at a positive value ( $1.17 \pm 0.03$  on average prior to October 2009)  
238 and transitioned to a negative value through the validation period ( $-0.19 \pm 0.34$  on average for  
239 October 2009 and after). This strong coefficient for the first half of training windows indicated  
240 that, unlike the results for simulated populations, the nonlinear antigenic novelty metric was  
241 historically an effective measure of antigenic drift. The historical importance of the epitope sites  
242 used for this metric was further supported by the relative enrichment of mutations at these  
243 sites for the most successful “trunk” lineages of natural populations compared to side branch  
244 lineages (Supplemental Table S2).

245 These results led us to hypothesize that the contribution of these specific epitope sites to  
246 antigenic drift has weakened over time. Importantly, these 49 epitope sites were originally  
247 selected by Łuksza and Lässig [7] from a previous historical survey of sites with beneficial  
248 mutations between 1968–2005 [22]. If the beneficial effects of mutations at these sites were due  
249 to historical contingency rather than a constant contribution to antigenic drift, we would expect  
250 models based on these sites to perform well until 2005 and then overfit relative to future data.  
251 Indeed, the epitope antigenic novelty model outperforms the naive model for the first three  
252 validation timepoints until it has to predict to April 2006. To test this hypothesis, we identified  
253 a new set of beneficial sites across our entire validation period of October 1990 through October  
254 2015. Inspired by the original approach of Shih et al. [22], we identified 25 sites in HA1 where  
255 mutations rapidly swept through the global population, including 12 that were also present  
256 in the original set of 49 sites. We fit an antigenic novelty model to these 25 sites across the  
257 complete validation period and dubbed this the “oracle antigenic novelty” model, as it benefited  
258 from knowledge of the future in its forecasts. The oracle model produced a consistently positive  
259 coefficient across all training windows ( $0.80 \pm 0.21$ ) and consistently outperformed the original  
260 epitope model with an average distance to the future of  $5.71 \pm 1.27$  AAs (Supplemental Fig. S9).  
261 These results support our hypothesis that the fitness benefit of mutations at the original 49 sites  
262 was due to historical contingency and that the success of previous epitope models based on these  
263 sites was partly due to “borrowing from the future”. We suspect that our HI antigenic novelty  
264 model benefits from its ability to constantly update its antigenic model at each timepoint with  
265 recent experimental phenotypes, while the epitope antigenic novelty metric is forced to give a  
266 constant weight to the same 49 sites throughout time.

267 Of the two metrics for functional constraint, mutational load outperformed DMS mutational  
268 effects, with an average distance to the future of  $6.14 \pm 1.37$  AAs compared to  $6.75 \pm 1.95$  AAs,  
269 respectively. In contrast to the original Łuksza and Lässig [7] model, where the coefficient of the  
270 mutational load metric was fixed at -0.5, our model learned a consistently stronger coefficient of  
271  $-0.99 \pm 0.30$ . Notably, the best performance of the DMS mutational effects model was forecasting  
272 from April 2007 to April 2008 when the major clade containing A/Perth/16/2009 was first  
273 emerging. This result is consistent with the DMS model overfitting to the evolutionary history  
274 of the background strain used to perform the DMS experiments. Alternate implementations  
275 of less background-dependent DMS metrics never performed better than the mutational load  
276 metric (Supplemental Table S3, Methods). Thus, we find that a simple model where any  
277 mutation at non-epitope sites is deleterious is more predictive of global viral success than a  
278 more comprehensive biophysical model based on measured mutational effects of a single strain.

279 LBI was the best individual metric by average distance to the future (Fig. 5) and tied mutational  
 280 load by outperforming the naive model at 17 (74%) timepoints (Table 2). Delta frequency  
 281 performed worse than LBI and HI antigenic novelty and was comparable to mutational load.  
 282 While delta frequency should, in principle, measure the same aspect of viral fitness as LBI, these  
 283 results show that the current implementations of these metrics represent qualitatively different  
 284 fitness components. The LBI and mutational load might also be predictive for reasons other  
 285 than correlation with fitness, see Discussion.

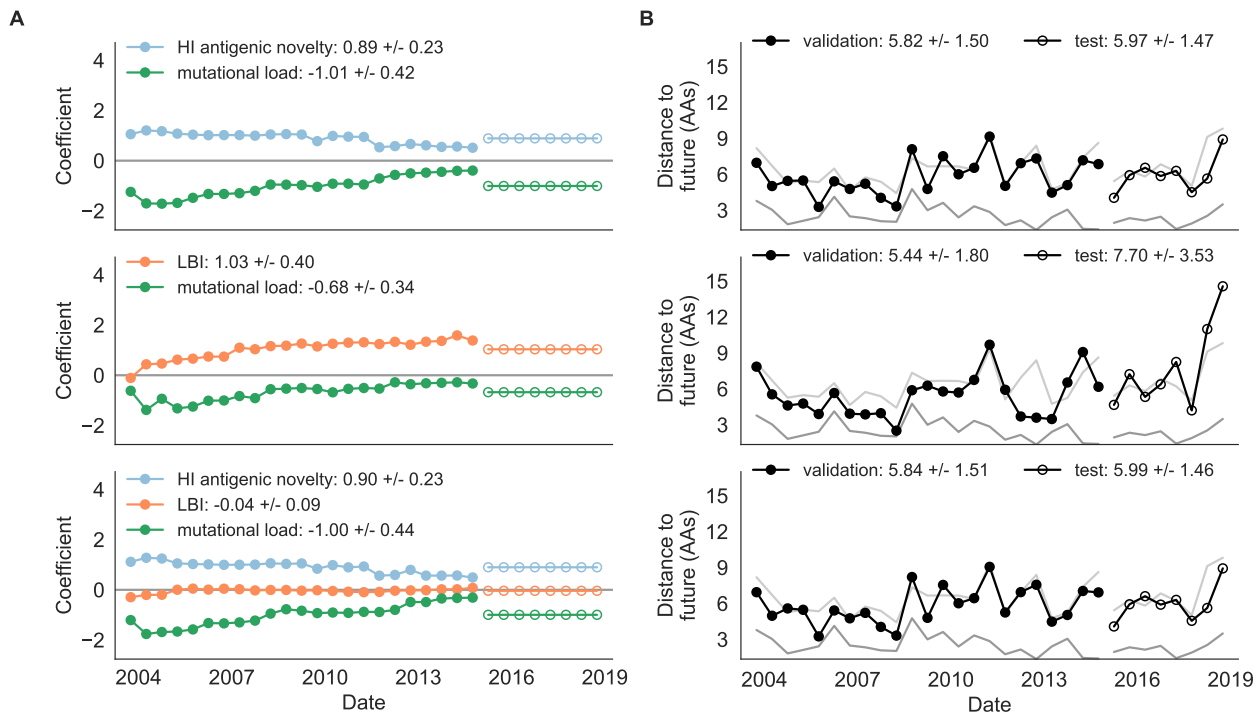

**Figure 6.** Natural population model coefficients and distances to the future for composite fitness metrics. A) Coefficients and B) distances are shown per validation timepoint (N=23) and test timepoint (N=8) as in Fig. 2.

286 To test whether composite models could outperform individual fitness metrics for natural  
 287 populations, we fit models based on combinations of best individual metrics representing  
 288 antigenic drift, functional constraint, and clade growth. Specifically, we fit models based on HI  
 289 antigenic novelty and mutational load, mutational load and LBI, and all three of these metrics  
 290 together. We anticipated that if these metrics all represented distinct, mutually beneficial  
 291 components of viral fitness, these composite models should perform better than individual  
 292 models with consistent coefficients for each metric.

293 Both two-metric composite models modestly outperformed their corresponding individual models  
 294 (Table 2, Fig. 6, and Supplemental Table S4). The composite of mutational load and LBI  
 295 performed the best overall with an average distance to the future of  $5.44 \pm 1.80$  AAs. The  
 296 relative stability of the coefficients for the metrics in the two-metric models suggested that these  
 297 metrics represented complementary components of viral fitness. In contrast, the three-metric

298 model strongly preferred the HI antigenic novelty and mutational load metrics over LBI for the  
299 entire validation period, producing an average LBI coefficient of  $-0.04 \pm 0.09$ . Overall, the gain  
300 by combining multiple predictors was limited and the sensitivity of coefficients to the set of  
301 metrics included in the model suggests that there is substantial overlap in predictive value of  
302 different metrics.

303 As with the simulated populations, we validated the performance of the best model for natural  
304 populations using estimated and observed clade frequency fold changes and the ranking of  
305 estimated best strains compared to the observed closest strains to future populations. The  
306 composite model of mutational load and LBI effectively captured clade dynamics with a fold  
307 change correlation of  $R^2 = 0.35$  and growth and decline accuracies of 87% and 89%, respectively  
308 (Supplemental Fig. S11A). Absolute forecasting error declined noticeably for clades with initial  
309 frequencies above 60%, but generally this error remained below 20% on average (Supplemental  
310 Fig. S11C). The estimated best strain from this model was in the top first percentile of observed  
311 closest strains for half of the validation timepoints and in the top 20th percentile for 20 (87%)  
312 of 23 timepoints (Supplemental Fig. S11B). This pattern held across all strains and timepoints  
313 with a strong correlation between observed and estimated strain ranks (Spearman's  $\rho^2 = 0.66$ ,  
314 Supplemental Fig. S11D).

315 Finally, we tested the performance of all models on out-of-sample data collected from October  
316 1, 2015 through October 1, 2019. We anticipated that most models would perform worse on  
317 truly out-of-sample data than on validation data. Correspondingly, only the three models with  
318 the HI antigenic novelty metric significantly outperformed the naive model on the test data  
319 (Table 2). The composite of HI antigenic novelty and mutational load performed modestly,  
320 although not significantly, better than the individual HI antigenic novelty model (Supplemental  
321 Table S4). Surprisingly, the best model for the validation data – mutational load and LBI –  
322 was one of the worst models for the test data with an average distance to the future of  $7.70 \pm$   
323  $3.53$  AAs. The individual LBI model was the worst model, while mutational load continued to  
324 perform well with test data. LBI performed especially poorly in the last two test timepoints of  
325 April and October 2018 (Fig. 5). These timepoints correspond to the dominance and sudden  
326 decline of a reassortant clade named A2/re [23]. By April 2018, the A2/re clade had risen to a  
327 global frequency over 50% from less than 15% the previous year, despite an absence of antigenic  
328 drift. By October 2018, this clade had declined in frequency to approximately 30% and, by  
329 October 2019, it had gone extinct. That LBI incorrectly predicted the success of this reassortant  
330 clade highlights a major limitation of growth-based fitness metrics and a corresponding benefit  
331 of more mechanistic metrics that explicitly measure antigenic drift and functional constraint.  
332 However, we cannot rule out the alternate possibility that the LBI model was overfit to the  
333 training data.

334 After identifying the composite HI antigenic novelty and mutational load model as the best  
335 model on out-of-sample data, we tested this model's ability to detect clade dynamics and select  
336 individual best strains for vaccine composition. The composite model partially captured clade  
337 dynamics with a Pearson's correlation of  $R^2 = 0.46$  between observed and estimated growth  
338 ratios and growth and decline accuracies of 52% and 58%, respectively (Fig. 7A). The mean  
339 absolute forecasting error with this model was consistently less than 20%, regardless of the

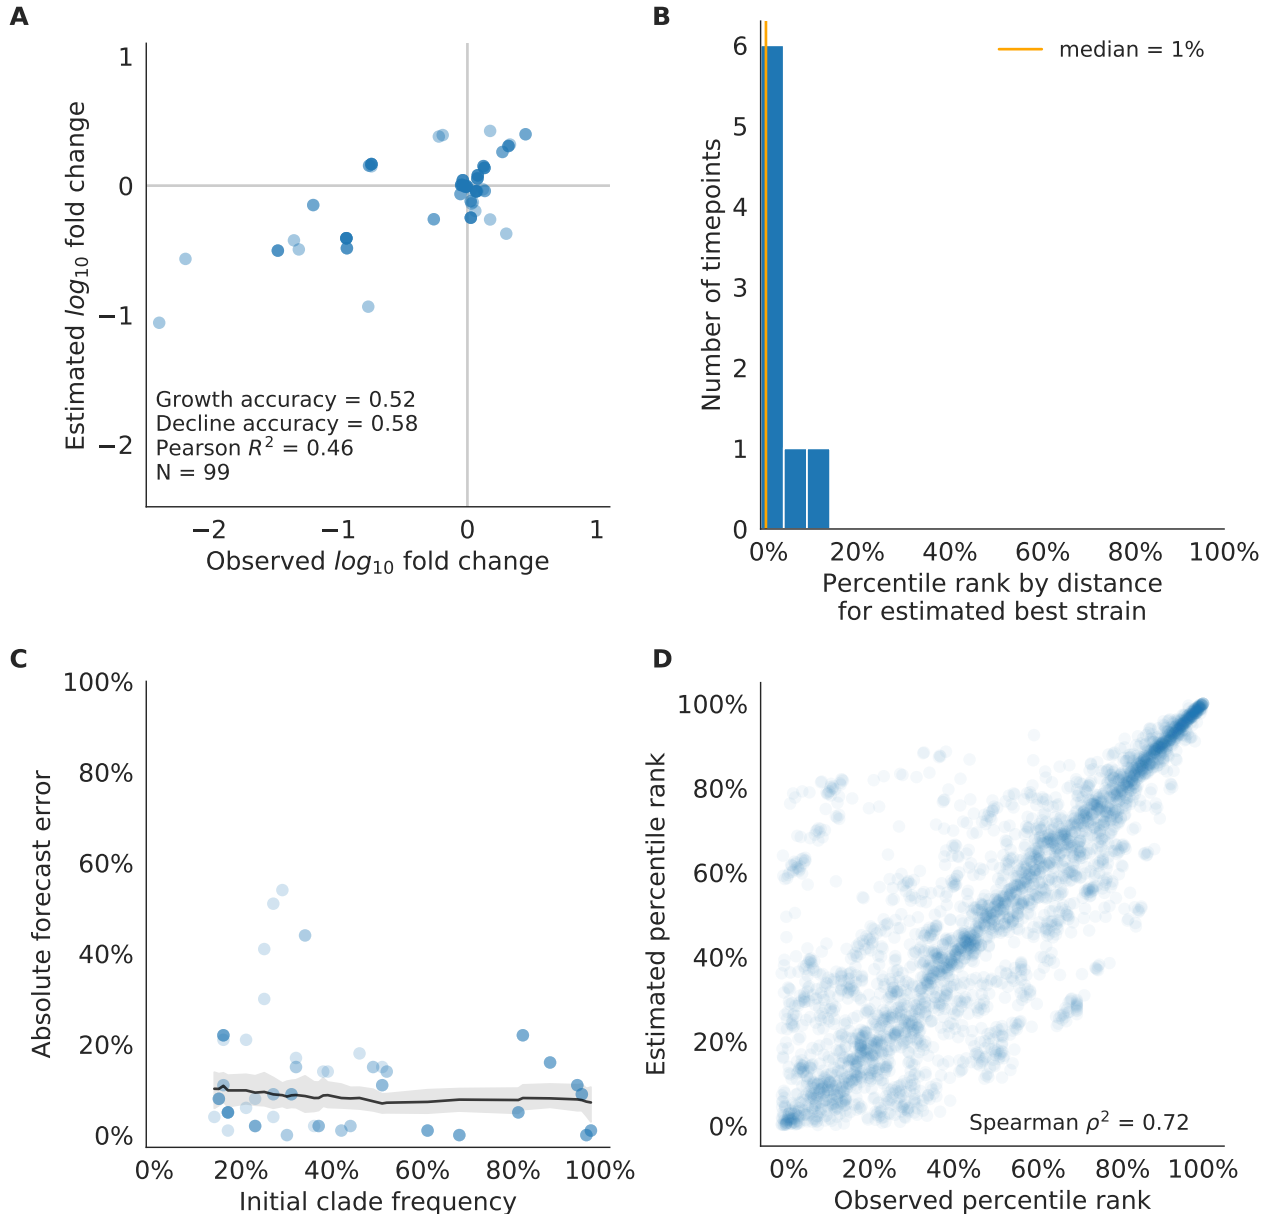

**Figure 7.** Test of best model for natural populations of H3N2 viruses, the composite model of HI antigenic novelty and mutational load. A) The correlation of estimated and observed clade frequency fold changes shows the model's ability to capture clade-level dynamics without explicitly optimizing for clade frequency targets. B) The rank of the estimated best strain based on its distance to the future for eight timepoints. The estimated best strain was in the top 20th percentile of observed closest strains for 100% of timepoints. C) Absolute forecast error for clades shown in A by their initial frequency with a mean LOESS fit (solid black line) and 95% confidence intervals (gray shading) based on 100 bootstraps. D) The correlation of all strains at all timepoints by the percentile rank of their observed and estimated distances to the future. The corresponding results for the naive model are shown in Supplemental Fig. S13.

340 initial clade frequency (Fig. 7C). The estimated best strain from this model was in the top first  
341 percentile of observed closest strains for half of the validation timepoints and in the top 20th  
342 percentile for 100% of timepoints (Fig. 7B). Similarly, the observed and estimated strain ranks  
343 strongly correlated (Spearman's  $\rho^2 = 0.72$ ) across all strains and test timepoints (Fig. 7D).

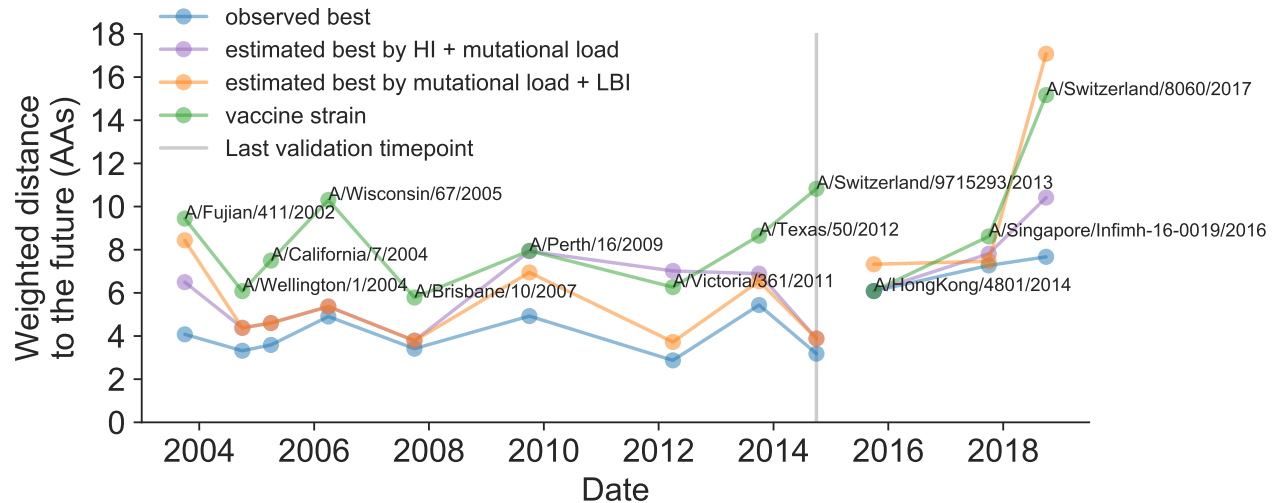

**Figure 8.** Observed distance to natural H3N2 populations one year into the future for each vaccine strain (green) and the observed (blue) and estimated closest strains to the future by the mutational load and LBI model (orange) and the HI antigenic novelty and mutational load model (purple). Vaccine strains were assigned to the validation or test timepoint closest to the date they were selected by the WHO. The weighted distance to the future for each strain was calculated from their amino acid sequences and the frequencies and sequences of the corresponding population one year in the future.

344 We further evaluated our models' ability to estimate the closest strain to the next season's H3N2  
345 population by comparing our best models' selections to the WHO's vaccine strain selection. For  
346 each season when the WHO selected a new vaccine strain and one year of future data existed in  
347 our validation or test periods, we measured the observed distance of that strain's sequence to  
348 the future and the corresponding distances to the future for the observed closest strains. We  
349 compared these distances to those of the closest strains to the future as estimated by our best  
350 models for the validation period (mutational load and LBI) and the test period (HI antigenic  
351 novelty and mutational load). The mutational load and LBI model selected strains that were as  
352 close or closer to the future than the corresponding vaccine strain for 10 (83%) of the 12 seasons  
353 with vaccine updates (Fig. 8). For the two seasons that the model selected more distant strains  
354 than the vaccine strain, the mean distance relative to the vaccine strain was 1.58 AAs. The HI  
355 antigenic novelty and mutational load model performed similarly by identifying strains as close  
356 or closer to the future for 11 (92%) seasons. For the one season that the model selected a more  
357 distant strain, that selected strain was 0.75 AAs farther from the future than the vaccine strain.



## 358 Historically-trained models enable real-time, actionable forecasts

359 To enable real-time forecasts, we integrated our forecasting framework into our existing open  
360 source pathogen surveillance application, Nextstrain [24]. Prior to finalizing our model coefficients  
361 for use in Nextstrain, we tested whether our three best composite models could be improved  
362 by learning new coefficients per timepoint from the test data. Additionally, we evaluated a  
363 composite of FRA antigenic novelty and mutational load. Since the earliest FRA data were from  
364 2012, we anticipated that there were enough measurements to fit a model across the test data  
365 time interval. If modern H3N2 strains continue to perform poorly in HI assays, the FRA-based  
366 assay will be critical for future forecasting efforts.

367 Two of three models performed worse after refitting coefficients to the test data than their  
368 original fixed coefficient implementations (Supplemental Fig. S14). While, the mutational load  
369 and LBI model improved considerably over its original performance, it still performed worse  
370 than the naive model on average. These results confirmed that the coefficients for our selected  
371 best model would be most accurate for live forecasts. Interestingly, the FRA antigenic novelty  
372 metric received a consistently positive coefficient of  $1.40 \pm 0.24$  in its composite with mutational  
373 load. Unfortunately, this model performed considerably worse than the corresponding HI-based  
374 model. These results suggest that we may need more FRA data across a longer historical  
375 timespan to train a model that could replace the HI-based model.

376 After confirming the coefficients for our best model of HI antigenic novelty and mutational  
377 load, we inspected forecasts of H3N2 clades using all data available up through June 6, 2020.  
378 Consistent with an average two-month lag between data collection and submission, the most  
379 recent data were collected up to April 1, 2020 and made our forecasts from this timepoint to  
380 April 1, 2021. Of the five major currently circulating clades, our model predicted growth of the  
381 clades 3c3.A and A1b/94N and decline of clades A1b/135K, A1b/137F, and A1b/197R (Fig. 9).  
382 To aid with identification of potential vaccine candidates for the next season, we annotated  
383 strains in the phylogeny by their estimated distance to the future based on our best model  
384 (Fig. 10).

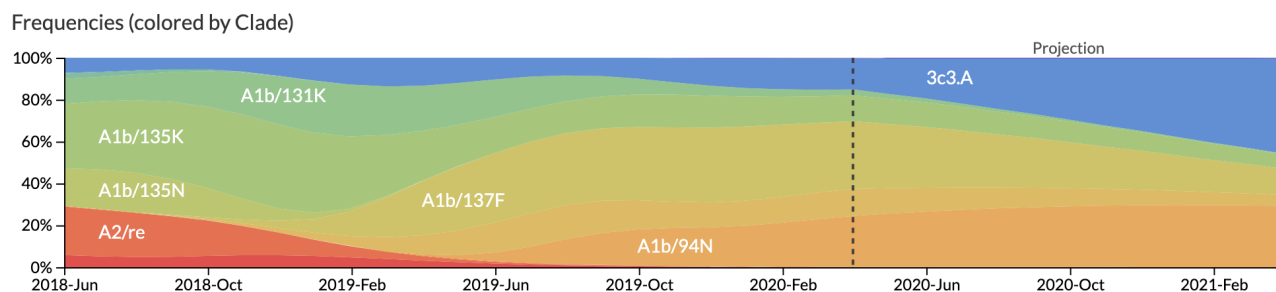

**Figure 9.** Snapshot of live forecasts on nextstrain.org from our best model (HI antigenic novelty and mutational load) for April 1, 2021. The observed frequency trajectories for currently circulating clades are shown up to April 1, 2020. Our model forecasts growth of the clades 3c3.A and A1b/94N and decline of all other major clades.

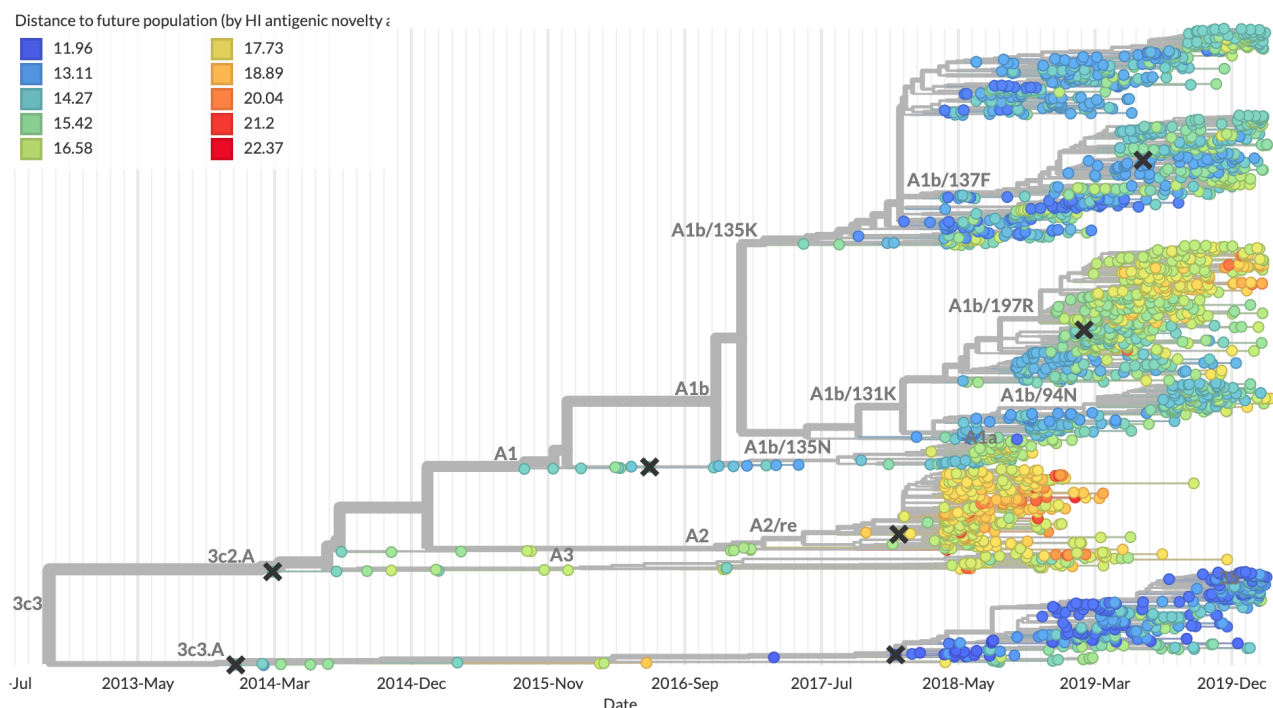

**Figure 10.** Snapshot of the last two years of seasonal influenza H3N2 evolution on nextstrain.org showing the estimated distance per strain to the future population. Distance to the future is calculated for each strain as the Hamming distance of HA amino acid sequences to all other circulating strains weighted by the other strain's projected frequencies under the best fitness model (HI antigenic novelty and mutational load).

## 385 Discussion

386 We have developed and rigorously tested a novel, open source framework for forecasting the  
387 long-term evolution of seasonal influenza H3N2 by estimating the sequence composition of  
388 future populations. A key innovation of this framework is its ability to directly compare  
389 viral populations between seasons using the earth mover's distance metric [25] and eliminate  
390 unavoidably stochastic clade definitions from phylogenies. The best models from this framework  
391 still effectively capture clade dynamics and accurately identify optimal vaccine candidates  
392 from simulated and natural H3N2 populations without relying on clades as model targets. We  
393 have further introduced novel fitness metrics based on experimental measurements of antigenic  
394 drift and functional constraint. We demonstrated that the integration of these phenotypic  
395 metrics with previously published sequence-only metrics produces more accurate forecasts than  
396 sequence-only models. We have added this framework as a component of seasonal influenza  
397 analyses on nextstrain.org where it provides real-time forecasts for influenza researchers, decision  
398 makers, and the public.

## 399 **Integration of genotypic and phenotypic metrics minimizes overfitting**

400 Our evaluation of models by time-series cross-validation and true out-of-sample forecasts  
401 revealed substantial potential for model overfitting. We observed overfitting to both specific  
402 genetic backgrounds and general historical contexts. A clear example of the former was the  
403 poor performance of our DMS-based fitness metric compared to a simpler mutational load  
404 metric. Although the DMS experiments provided detailed estimates of which amino acids  
405 were preferred at which positions in HA, these measurements were specific to a single strain,  
406 A/Perth/16/2009 [11]. When we applied these measurements to predict the success of global  
407 populations, they were less informative on average than the naive model. To benefit from the  
408 more comprehensive fitness costs measured by DMS data, future models will need to synthesize  
409 DMS measurements across multiple H3N2 strains from distinct genetic contexts. We anticipate  
410 that these measurements could be used to define and continually update a modern set of sites  
411 contributing to mutational load in natural populations. This set of sites could replace the  
412 statically defined set of “non-epitope” sites we use to estimate mutational load here.

413 We observed overfitting to historical context in sequence-based models of antigenic drift. The  
414 fitness benefit of mutations that led to antigenic drift in H3N2 in the past is well-documented  
415 [20, 26–28]. Although the antigenic importance of seven specific sites in HA were experimentally  
416 validated by Koel et al. 2013 [28], these sites do not explain all antigenic drift observed in  
417 natural populations [10]. Other attempts to define these so-called “epitope sites” have relied on  
418 either aggregation of results from antigenic escape assays [27] or retrospective computational  
419 analyses of sites with beneficial mutations [7, 22]. We found that models based on all of these  
420 definitions except for the seven Koel epitope sites overfit to the historical context from which  
421 they were identified (Supplemental Table S3). These results suggest that the set of sites that  
422 contribute to antigenic drift at any given time may depend on both the fitness landscape of  
423 currently circulating strains and the immune landscape of the hosts these strains need to infect.  
424 Recent experimental mapping of antigenic escape mutations in H3N2 HA with human sera show  
425 that the specific sites that confer antigenic escape can vary dramatically between individuals  
426 based on their exposure history [29]. In contrast to models based on predefined “epitope sites”,  
427 our model based on experimental measurements of antigenic drift did not suffer from overfitting  
428 in the validation or test periods. We suspect that this model was able to minimize overfitting by  
429 continuously updating its antigenic model with recent experimental data and assigning antigenic  
430 weight to branches of a phylogeny rather than specific positions in HA.

431 Even the most accurate models with few parameters will sometimes fail due to the probabilistic  
432 nature of evolution. For example, the model with the best performance across our validation data  
433 – mutational load and LBI – was also one of the worst models across our test data. Specifically,  
434 we found that this model failed to predict the sudden decline of a dominant reassortant clade,  
435 A2/re, in 2019. Despite this model’s excellent performance historically, it was unable to account  
436 for rare yet important events such as reassortment.

437 Finally, we observed that composite models of multiple orthogonal fitness metrics often out-  
438 performed models based on their individual components. These results are consistent with  
439 previous work that found improved performance by integrating components of antigenic drift,

440 functional constraint, and clade growth [7]. However, the effective elimination of LBI from  
441 our three-metric model during the validation period (Fig. 6) reveals the limitations of our  
442 current additive approach to composite models. The recent success of weighted ensembles for  
443 short-term influenza forecasting [30] suggests that long-term forecasting may benefit from a  
444 similar approach.

## 445 **Forecasting framework aids practical forecasts**

446 By forecasting the composition of future H3N2 populations with biologically-informed fitness  
447 metrics, our best models consistently outperformed a naive model (Table 2). While this  
448 performance confirms previously demonstrated potential for long-term influenza forecasting [7],  
449 the average gain from these models over the naive model appears low at 0.96 AAs per year for  
450 validation data and 0.85 AAs per year for test data. However, these results are consistent with  
451 the observed dynamics of H3N2. First, the one-year forecast horizon is a fraction of the average  
452 coalescence time for H3N2 populations of about 3–8 years [31]. Hence, we expect the diversity  
453 of circulating strains to persist between seasons. Second, H3N2 hemagglutinin accumulates 3.6  
454 amino acid changes per year [20]. This accumulation of amino acid substitutions contributes  
455 to the distance between annual populations observed by the naive model. In this context, our  
456 model gains of 0.96 and 0.85 AAs per year correspond to an explanation of 27% and 24% of the  
457 expected additional distance between annual populations, respectively.

458 Several clear opportunities to improve forecasts still remain. Integration of more recent experi-  
459 mental data may improve estimates of antigenic drift. Despite the weak performance of our FRA  
460 antigenic novelty model on recent data, continued accumulation of FRA measurements over  
461 time should eventually enable models as accurate as the current HI-based models. In addition  
462 to these FRA data based on ferret antisera, recent high-throughput antigenic escape assays  
463 with human sera promise to improve existing definitions of epitope sites [29]. These assays  
464 reveal the specific sites and residues that confer antigenic escape from polyclonal sera obtained  
465 from individual humans. A sufficiently broad geographic and temporal sample of human sera  
466 with these assays could reveal consistent patterns of the immune landscape H3N2 strains must  
467 navigate to be globally successful. Models should also integrate information from multiple  
468 segments of the influenza genome and will need to balance the fitness benefits of evolution in  
469 genes such as neuraminidase [32] with the costs of reassortment [33]. Finally, forecasting models  
470 need to account for the geographic distribution of viruses and the vastly different sampling  
471 intensities across the globe. Most influenza sequence data come from highly developed countries  
472 that account for a small fraction of the global population, while globally successful clades of  
473 influenza H3N2 often emerge in less well-sampled regions [31, 34, 35]. Explicitly accounting for  
474 these sampling biases and the associated migration dynamics would allow models to weight  
475 forecasts based on both viral fitness and transmission.

## 476 **The nature of the predictive power of individual metrics remains** 477 **unclear**

478 Prediction of future influenza virus populations is intrinsically limited by the small number of  
479 data points available to train and test models. Increasingly more complex models are therefore  
480 prone to overfitting. Across the validation and test periods, we found that antigenic drift and  
481 mutational load were the most robust predictors of future success for seasonal influenza H3N2  
482 populations.

483 Several metrics like the rate of frequency change or epitope mutations are naively expected to  
484 have predictive power but do not. Others metrics like the mutational load are not expected to  
485 measure adaptation but are predictive. These results point to one aspect that often overlooked  
486 when comparing the genetic make-up of an asexual population at two time points: the future  
487 population is unlikely to descend from any of the sampled tips but ancestral lineages of the future  
488 population merge with those of the present population in the past. Optimal representatives of  
489 the future therefore tend to be tips in the present that tend to be basal and less evolved. The  
490 LBI and the mutational load metric have the tendency to assign low fitness to evolved tips. The  
491 LBI in particular assigns high fitness to the base of large clades. Much of the predictive power,  
492 in the sense of a reduced distance between the predicted and observed populations, might be  
493 due to putting more weight on less evolved strains rather than *bona fide* prediction of fitness.  
494 In a companion manuscript, Barrat-Charlaix et al. show that LBI has little predictive power for  
495 fixation probabilities of mutations in H3N2.

496 Our framework enables real-time practical forecasts of these populations by leveraging historical  
497 and modern experimental assays and gene sequences. By releasing our framework as an open  
498 source tool based on modern data science standards like tidy data frames, we hope to encourage  
499 continued development of this tool by the influenza research community. We additionally  
500 anticipate that the ability to forecast the sequence composition of populations with earth  
501 mover's distance will enable future forecasting research with pathogens whose genomes cannot  
502 be analyzed by traditional phylogenetic methods including recombinant viruses, bacteria, and  
503 fungi.

## 504 **Model sharing and extensions**

505 The entire workflow for our analyses was implemented with Snakemake [36]. We have provided  
506 all source code, configuration files, and datasets at <https://github.com/blab/flu-forecasting>.

## 507 **Materials and methods**

### 508 **Simulation of influenza H3N2-like populations**

509 We simulated the long-term evolution of H3N2-like viruses with SANTA-SIM [37] for 10,000  
510 generations or 50 years where 200 generations was equivalent to 1 year. We discarded the first  
511 10 years as a burn-in period, selected the next 30 years for model fitting and validation, and held  
512 out the last 9 years as out-of-sample data for model testing. Each simulated population was  
513 seeded with the full length HA from A/Beijing/32/1992 (NCBI accession: U26830.1) such that  
514 all simulated sequences contained signal peptide, HA1, and HA2 domains. We defined purifying  
515 selection across all three domains, allowing the preferred amino acid at each site to change at a  
516 fixed rate over time. We additionally defined exposure-dependent selection for 49 putative epitope  
517 sites in HA1 [7] to impose an effect of antigenic novelty that would allow mutations at those sites  
518 to increase viral fitness despite underlying purifying selection. We modified the SANTA-SIM  
519 source code to enable the inclusion of true fitness values for each strain in the FASTA header of  
520 the sampled sequences from each generation. This modified implementation has been integrated  
521 into the official SANTA-SIM code repository at <https://github.com/santa-dev/santa-sim>  
522 as of commit e2b3ea3. For our full analysis of model performance, we sampled 90 viruses per  
523 month to match the sampling density of natural populations. For tuning of hyperparameters,  
524 we sampled 10 viruses per month to enable rapid exploration of hyperparameter space.

### 525 **Hyperparameter tuning with simulated populations**

526 To avoid overfitting our models to the relatively limited data from natural populations, we used  
527 simulated H3N2-like populations to tune hyperparameters including the KDE bandwidth for  
528 frequency estimates and the L1 penalty for model coefficients. We simulated populations, as  
529 described above, and fit models for each parameter value using the true fitness of strains from  
530 the simulator.

531 We identified the optimal KDE bandwidth for frequencies as the value that minimized the  
532 difference between the mean distances to the future from the true fitness model and the naive  
533 model. We set the L1 lambda penalty to zero, to reduce variables in the analysis and avoid  
534 interactions between the coefficients and the KDE bandwidths. Higher bandwidths completely  
535 wash out dynamics of populations by making all strains appear to exist for long time periods.  
536 This flattening of frequency trajectories means that as bandwidths increase, the naive model  
537 gets more accurate and less informative. Given this behavior, we found the bandwidth that  
538 produced the minimum difference between distances to the future for the true fitness and naive  
539 models instead of the bandwidth that produced the minimum mean model distance. Based on  
540 this analysis, we identified an optimal bandwidth of  $\frac{2}{12}$  or the equivalent of 2-months for floating  
541 point dates. Next, we identified an L1 penalty of 0.1 for model coefficients that minimized the  
542 mean distance to the future for the true fitness model.

## 543 **Antigenic data**

544 Hemagglutination inhibition (HI) measurements were provided by WHO Global Influenza  
545 Surveillance and Response System (GISRS) Collaborating Centers in London, Melbourne,  
546 Atlanta and Tokyo. We converted these raw two-fold dilution measurements to  $\log_2$  titer drops  
547 normalized by the corresponding  $\log_2$  autologous measurements as previously described [10].

## 548 **Strain selection for natural populations**

549 Prior to our analyses, we downloaded all HA sequences and metadata from GISAID [16]. For  
550 model training and validation, we selected 15,583 HA sequences  $\geq 900$  nucleotides that were  
551 sampled between October 1, 1990 and October 1, 2015. To account for known variation in  
552 sequence availability by region, we subsampled the selected sequences to a representative set  
553 of 90 viruses per month with even sampling across 10 global regions including Africa, Europe,  
554 North America, China, South Asia, Japan and Korea, Oceania, South America, Southeast Asia,  
555 and West Asia. We excluded all egg-passaged strains and all strains with ambiguous year,  
556 month, and day annotations. We prioritized strains with more available HI titer measurements.  
557 For model testing, we selected an additional 7,171 HA sequences corresponding to 90 viruses per  
558 month sampled between October 1, 2015 and October 1, 2019. We used these test sequences  
559 to evaluate the out-of-sample error of fixed model parameters learned during training and  
560 validation. Supplemental File S1 describes contributing laboratories for all 22,754 validation  
561 and test strains.

## 562 **Phylogenetic inference**

563 For each timepoint in model training, validation, and testing, we selected the subsampled HA  
564 sequences with collection dates up to that timepoint. We aligned sequences with the augur  
565 align command [24] and MAFFT v7.407 [38]. We inferred initial phylogenies for HA sequences  
566 at each timepoint with IQ-TREE v1.6.10 [39]. To reconstruct time-resolved phylogenies, we  
567 applied TreeTime v0.5.6 [40] with the augur refine command.

## 568 **Frequency estimation**

569 To account for uncertainty in collection date and sampling error, we applied a kernel density  
570 estimation (KDE) approach to calculate global strain frequencies. Specifically, we constructed a  
571 Gaussian kernel for each strain with the mean at the reported collection date and a variance  
572 (or KDE bandwidth) of two months. The bandwidth was identified by cross-validation, as  
573 described above. This bandwidth also roughly corresponds to the median lag time between  
574 strain collection and submission to the GISAID database. We estimated the frequency of each  
575 strain at each timepoint by calculating the probability density function of each KDE at that

576 timepoint and normalizing the resulting values to sum to one. We implemented this frequency  
577 estimation logic in the `augur frequencies` command.

## 578 **Model fitting and evaluation**

### 579 **Fitness model**

580 We assumed that the evolution seasonal influenza H3N2 populations can be represented by a  
581 Malthusian growth fitness model, as previously described [7]. Under this model, we estimated  
582 the future frequency,  $\hat{x}_i(t + \Delta t)$ , of each strain  $i$  from the strain's current frequency,  $x_i(t)$ , and  
583 fitness,  $f_i(t)$ , as follows where the resulting future frequencies were normalized to one by  $\frac{1}{Z(t)}$ .

$$\hat{x}_i(t + \Delta t) = \frac{1}{Z(t)} x_i(t) \exp(f_i(t) \Delta t) \quad (1)$$

584 We defined the fitness of each strain at time  $t$  as the additive combination of one or more fitness  
585 metrics,  $f_{i,m}$ , scaled by fitness coefficients,  $\beta_m$ . For example, Equation 2 estimates fitness per  
586 strain by mutational load (ml) and local branching index (lbi).

$$f_i(t) = \beta_{\text{ne}} f_{i,\text{ml}}(t) + \beta_{\text{lbi}} f_{i,\text{lbi}}(t) \quad (2)$$

### 587 **Model target**

588 For a model based on any given combination of fitness metrics, we found the fitness coefficients  
589 that minimized the earth mover's distance (EMD) [25, 41] between amino acid sequences from  
590 the observed future population at time  $u = t + \Delta t$  and the estimated future population created  
591 by projecting frequencies of strains at time  $t$  by their estimated fitnesses. Solving for EMD  
592 identifies the minimum amount of "earth" that must be moved from a source population to a  
593 sink population to make those populations as similar as possible. This solution requires both a  
594 "ground distance" between pairs of strains from both populations and weights assigned to each  
595 strain that determine how much that strain contributes to the overall distance.

596 For each timepoint  $t$  and corresponding timepoint  $u = t + 1$ , we defined the ground distance  
597 as the Hamming distance between HA amino acid sequences for all pairs of strains between  
598 timepoints. For strains with less than full length nucleotide sequences, we inferred missing  
599 nucleotides through TreeTime's ancestral sequence reconstruction analysis. We defined weights  
600 for strains at timepoint  $t$  based on their projected future frequencies. We defined weights  
601 for strains at timepoint  $u$  based on their observed frequencies. We then identified the fitness  
602 coefficients that provided projected future frequencies that minimized the EMD between the  
603 estimated and observed future populations. With this metric, a perfect estimate of the future's  
604 strain sequence composition and frequencies would produce a distance of zero. However, the  
605 inevitable accumulation of substitutions between the two populations prevents this outcome.



606 We calculated EMD with the Python bindings for the OpenCV 3.4.1 implementation [42]. We  
607 applied the Nelder-Mead minimization algorithm as implemented in SciPy [43] to learn fitness  
608 coefficients that minimize the average of this distance metric over all timepoints in a given  
609 training window.

## 610 Lower bound on earth mover’s distance

611 The minimum distance to the future between any two timepoints cannot be zero due to the  
612 accumulation of mutations between populations. We estimated the lower bound on earth mover’s  
613 distance between timepoints using the following greedy solution to the optimal transport problem.  
614 For each timepoint  $t$ , we initialized the optimal frequency of each current strain to zero. For  
615 each strain in the future timepoint  $u$ , we identified the closest strain in the current timepoint by  
616 Hamming distance and added the frequency of the future strain to the optimal frequency of the  
617 corresponding current strain. This approach allows each strain from timepoint  $t$  to accumulate  
618 frequencies from multiple strains at timepoint  $u$ . We calculated the minimum distance between  
619 populations as the earth mover’s distance between the resulting optimal frequencies for current  
620 strains, the observed frequencies of future strains, and the original distance matrix between  
621 those two populations.

## 622 Strain-specific distance to the future

623 We calculated the weighted Hamming distance to the future of each strain from the strain’s HA  
624 amino acid sequence and the frequencies and sequences of the corresponding population one  
625 year in the future. Specifically, the distance between any strain  $i$  from timepoint  $t$  to the future  
626 timepoint  $u$  was the Hamming distance,  $h$ , between strain  $i$ ’s amino acid sequence,  $s_i$ , each  
627 future strain  $j$ ’s amino acid sequence,  $s_j$ , and the frequency of strain  $j$  in the future timepoint,  
628  $x_j(u)$ .

$$d_i(u) = \sum_{j \in s(u)} x_j(u) h(s_i, s_j) \quad (3)$$

629 We calculated the estimated distance to the future for live forecasts with the same approach,  
630 replacing the observed future population frequencies and sequences with the estimated population  
631 based on our models.

$$d_i(\hat{u}) = \sum_{j \in s(\hat{u})} x_j(\hat{u}) h(s_i, s_j) \quad (4)$$

## 632 Time-series cross-validation

633 To obtain unbiased estimates for the out-of-sample errors of our models, we adopted the standard  
634 cross-validation strategy of training, validation, and testing. We divided our available data into

635 an initial training and validation set spanning October 1990 to October 2015 and an additional  
636 testing set spanning October 2015 to October 2019. We partitioned our training and validation  
637 data into six month seasons corresponding to winter in the Northern Hemisphere (October–April)  
638 and the Southern Hemisphere (April–October) and trained models to estimate frequencies of  
639 populations one year into the future from each season in six-year sliding windows. To calculate  
640 validation error for each training window, we applied the resulting model coefficients to estimate  
641 the future frequencies for the year after the last timepoint in the training window. These  
642 validation errors informed our tuning of hyperparameters. Finally, we fixed the coefficients for  
643 each model at the mean values across all training windows and applied these fixed models to  
644 the test data to estimate the true forecasting accuracy of each model on previously unobserved  
645 data.

## 646 **Model comparison by bootstrap tests**

647 We compared the performance of different pairs of models using bootstrap tests. For each  
648 timepoint, we calculated the difference between one model’s earth mover’s distance to the future  
649 and the other model’s distance. Values less than zero in the resulting empirical distribution  
650 represent when the first model outperformed the second model. To determine whether the  
651 first model generally outperformed the second model, we bootstrapped the empirical difference  
652 distributions for  $n=10,000$  samples and calculated the mean difference of each bootstrap sample.  
653 We calculated an empirical p value for the first model as the proportion of bootstrap samples  
654 with mean values greater than or equal to zero. This p value represents how likely the mean  
655 difference between the models’ distances to the future is to be zero or greater. We measured  
656 the effect size of each comparison as the mean  $\pm$  the standard deviation of the bootstrap  
657 distributions. We performed pairwise model comparisons for all biologically-informed models  
658 against the naive model (Supplemental Figs. S4 and S10). We also compared a subset of  
659 composite models to their respective individual models (Supplemental Table S4).

## 660 **Fitness metrics**

661 We defined the following fitness metrics per strain and timepoint.

## 662 **Antigenic drift**

663 We estimated antigenic drift for each strain using either genetic or HI data. To estimate  
664 antigenic drift with genetic data, we implemented an antigenic novelty metric based on the  
665 “cross-immunity” metric originally defined by Luksza and Lässig [7]. Briefly, for each pair of  
666 strains in adjacent seasons, we counted the number of amino acid differences between the strains’  
667 HA sequences at 49 epitope sites. The one-based coordinates of these sites relative to the start  
668 of the HA1 segment were 50, 53, 54, 121, 122, 124, 126, 131, 133, 135, 137, 142, 143, 144,  
669 145, 146, 155, 156, 157, 158, 159, 160, 163, 164, 172, 173, 174, 186, 188, 189, 190, 192, 193,  
670 196, 197, 201, 207, 213, 217, 226, 227, 242, 244, 248, 275, 276, 278, 299, and 307. We limited

671 pairwise comparisons to all strains sampled within the last five years from each timepoint.  
672 For each individual strain  $i$  at each timepoint  $t$ , we estimated that strain’s ability to escape  
673 cross-immunity by summing the exponentially-scaled epitope distances between previously  
674 circulating strains and the given strain as in Equation 5. We defined the constant  $D_0 = 14$ ,  
675 as in the original definition of cross-immunity [7]. To compare these epitope sites with other  
676 previously published sites, we fit epitope antigenic novelty models based on sites defined by  
677 Wolf et al. 2006 [27] and Koel et al. 2013 [28].

$$f_{i,ep}(t) = \sum_{j:t_j < t_i} -\max(x_j) \exp(-D_{ep}(a_i, a_j)/D_0) \quad (5)$$

678 To test the historical contingency of the epitope sites defined above, we additionally identified a  
679 new set of sites with beneficial mutations across the training/validation period of October 1990  
680 through October 2015. Following the general approach of Shih et al. [22], we manually identified  
681 25 sites in HA1 where mutations rapidly swept through the global population. We required  
682 mutations to emerge from below 5% global frequency and reach >90% frequency. Although we  
683 did not require sweeps to complete within a fixed amount of time, we observed that they required  
684 no longer than one to three years to complete. To minimize false positives, we eliminated any  
685 sites where one or more mutations rose above 20% frequency and subsequently died out. If  
686 two or more sites had redundant sweep dynamics (mutations emerging and fixing at the same  
687 times), we retained the site with the most mutational sweeps. Based on this requirements, we  
688 defined our final collection of “oracle” sites in HA1 coordinates as 3, 45, 48, 50, 75, 140, 145,  
689 156, 158, 159, 173, 186, 189, 193, 198, 202, 212, 222, 223, 225, 226, 227, 278, 311, and 312.

690 To estimate antigenic drift with HI data, we first applied the titer tree model to the phylogeny  
691 at a given timepoint and the corresponding HI data for its strains, as previously described by  
692 Neher et al. 2016 [10]. This method effectively estimates the antigenic drift per branch in units  
693 of  $\log_2$  titer change. We selected all strains with nonzero frequencies in the last six months  
694 as “current strains” and all strains sampled five years prior to that threshold as “past strains”.  
695 Next, we calculated the pairwise antigenic distance between all current and past strains as the  
696 sum of antigenic drift weights per branch on the phylogenetic path between each pair of strains.  
697 Finally, we calculated each strain’s ability to escape cross-immunity using Equation 5 with the  
698 pairwise distances between epitope sequences replaced with pairwise antigenic distance from HI  
699 data. As with the original epitope antigenic novelty described above, this HI antigenic novelty  
700 metric produces higher values for strains that are more antigenically distinct from previously  
701 circulating strains.

## 702 **Functional constraint**

703 We estimated functional constraint for each strain using either genetic or deep mutational  
704 scanning (DMS) data. To estimate functional constraint with genetic data, we implemented the  
705 non-epitope mutation metric originally defined by Łuksza and Lässig [7]. This metric counts  
706 the number of amino acid differences at 517 non-epitope sites in HA sequences between each

707 strain  $i$  at timepoint  $t$  and that strain's most recent inferred ancestral sequence in the previous  
708 season ( $t - 1$ ).

709 We estimated functional constraint using mutational preferences from DMS data as previously  
710 defined [11]. Briefly, mutational effects were defined as the log ratio of DMS preferences,  $\pi$ , at  
711 site  $r$  for the derived amino acid,  $a_i$ , and the ancestral amino acid,  $a_j$ . As with the non-epitope  
712 mutation metric above, we considered only substitutions in HA between each strain  $i$  and that  
713 strain's most recent inferred ancestral sequence in the previous season. We calculated the total  
714 effect of these substitutions as the sum of the mutational preferences for each substitution, as in  
715 Equation 6.

$$f_{i,\text{DMS}}(t) = \sum_{r \in r, a_i \neq r, a_j} \log_2 \frac{\pi_{r, a_i}}{\pi_{r, a_j}} \quad (6)$$

716 To determine whether DMS preferences could be used to define fitness metrics that were less  
717 dependent on the historical context of the background strain, we implemented two additional  
718 DMS-based metrics: “DMS entropy” and “DMS mutational load”. For both metrics, we  
719 calculated the distance between HA amino acid sequences of each strain and its ancestral  
720 sequence in the previous season, to enable comparison of these metrics with the DMS mutational  
721 effects and mutational load metrics. For the “DMS entropy” metric, we calculated the distance  
722 between sequences such that each mismatch was weighted by the inverse entropy of DMS  
723 preferences at the site of the mismatch. We expected this metric to produce a negative  
724 coefficient similar to the mutational load metric, as higher values will result from mutations at  
725 sites with lower entropy and, thus, lower tolerance for mutations. For the “DMS mutational  
726 load” metric, we defined a novel set of non-epitope sites corresponding to each position in  
727 HA with a standardized entropy less than zero. With this metric, we sought to identify more  
728 highly conserved sites without weighting any one site differently from others. We anticipated  
729 that this lack of site-specific weighting would make the DMS mutational load metric even less  
730 background-dependent than the DMS entropy and DMS mutational effect metrics.

## 731 Clade growth

732 We estimated clade growth for each strain using local branching index (LBI) and the change in  
733 frequency over time (delta frequency). To calculate LBI for each strain at each timepoint, we  
734 applied the LBI heuristic algorithm as originally described [9] to the phylogenetic tree constructed  
735 at each timepoint. We set the neighborhood parameter,  $\tau$ , to 0.3 and only considered viruses  
736 sampled in the last 6 months of each phylogeny as contributing to recent clade growth.

737 We estimated the change in frequency over time by calculating clade frequencies under a  
738 Brownian motion diffusion process as previously described [11]. These frequency calculations  
739 allowed us to assign a partial clade frequency to each strain within nested clades. We calculated  
740 the delta frequency as the change in frequency for each strain between the most recent timepoint  
741 in a given phylogeny and six months prior to that timepoint divided by 0.5 years.

## 742 Clustering of amino acid sequences for visualization

743 For the purpose of visualizing related amino acid sequences in Fig. 1, we applied dimensionality  
744 reduction to pairwise amino acid distances followed by hierarchical clustering. Specifically, we  
745 selected a representative tree from our simulated population of viruses at month 10 of year  
746 30. From this tree, we selected all strains with a collection date in the previous two years. We  
747 calculated the pairwise Hamming distance between the full-length HA amino acid sequences for  
748 all selected strains and applied t-SNE dimensionality reduction [44] to the resulting distance  
749 matrix (n=2 components, perplexity=30.0, and learning rate=400). We assigned each strain to  
750 a cluster based on its two-dimensional t-SNE embedding using DBSCAN [45] with a maximum  
751 neighborhood distance of 10 AAs and a minimum of 20 strains per cluster. Despite known  
752 limitations of applying hierarchical clustering to manifold projections that do not preserve  
753 sample density, this approach allowed us to effectively assign strains to qualitative genetic  
754 clusters for the purposes of visualization.

## 755 Data and software availability

756 All source code, configuration files, and datasets are available at <https://github.com/blab/flu-forecasting>.  
757

## 758 Acknowledgments

759 We thank the Influenza Division at the US Centers for Disease Control and Prevention, the  
760 Victorian Infectious Diseases Reference Laboratory at the Australian Peter Doherty Institute for  
761 Infection and Immunity, the Influenza Virus Research Center at the Japan National Institute of  
762 Infectious Diseases, the Crick Worldwide Influenza Centre at the UK Francis Crick Institute for  
763 sharing HI and FRA data.

764 We gratefully acknowledge the authors, originating and submitting laboratories of the sequences  
765 from the GISAID EpiFlu Database [16] on which this research is based. The list is detailed in  
766 the Supplemental Material.

767 We thank Jesse Bloom, Erick Matsen, Bing Brunton, Harmit Malik, Sidney Bell, Allison Black,  
768 Lola Arakaki, Duncan Ralph, and members of the Bedford lab for useful advice and discussions.  
769 JH is a Graduate Research Fellow and is supported by the NIH grant NIAID F31AI140714.  
770 The work done at the Crick Worldwide Influenza Centre was supported by the Francis Crick  
771 Institute receiving core funding from Cancer Research UK (FC001030), the Medical Research  
772 Council (FC001030) and the Wellcome Trust (FC001030). SF, KN, KN, SW and HH were  
773 supported by the Ministry of Health, Labour and Welfare, Japan (10110400). SW was supported  
774 by the Japan Agency for Medical Research and Development (JPfk0108118). The Melbourne  
775 WHO Collaborating Centre for Reference and Research on Influenza is supported by the  
776 Australian Government Department of Health. RAN is supported by NIAID R01 AI127893-01

777 and institutional core funding. TB is a Pew Biomedical Scholar and is supported by NIH grants  
778 NIGMS R35 GM119774-01, NIAID U19 AI117891-01 and NIAID R01 AI127893-01.

779 The findings and conclusions in this report are those of the author(s) and do not necessarily  
780 represent the official position of the Centers for Disease Control and Prevention.

## 781 **Author contributions**

782 JH planned experiments, implemented the final forecasting framework, analyzed results, and  
783 wrote the manuscript. JB, TR, XX, RK, DEW, LW, BE, RSD, JWM, SF, KN, NK, SW, HH,  
784 IB, and KS performed and provided data from serological assays. RAN planned experiments and  
785 edited the manuscript. TB planned experiments, implemented the initial forecasting framework,  
786 and edited the manuscript.

## 787 **Competing interests**

788 The authors declare that no competing interests exist.

## 789 References

- 790 [1] World Health Organization (2014) Seasonal influenza fact sheet. Available at <http://www.who.int/mediacentre/factsheets/fs211/en/>.  
791
- 792 [2] Hirst GK (1943) Studies of antigenic differences among strains of influenza A by means of  
793 red cell agglutination. *J Exp Med* 78: 407–423.
- 794 [3] Chambers BS, Parkhouse K, Ross TM, Alby K, Hensley SE (2015) Identification of  
795 hemagglutinin residues responsible for H3N2 antigenic drift during the 2014-2015 influenza  
796 season. *CellReports* 12: 1–6.
- 797 [4] Zost SJ, Parkhouse K, Gumina ME, Kim K, Diaz Perez S, Wilson PC, Treanor JJ, Sant AJ,  
798 Cobey S, Hensley SE (2017) Contemporary H3N2 influenza viruses have a glycosylation  
799 site that alters binding of antibodies elicited by egg-adapted vaccine strains. *Proceedings*  
800 *of the National Academy of Sciences* 114: 12578–12583.
- 801 [5] Okuno Y, Tanaka K, Baba K, Maeda A, Kunita N, Ueda S (1990) Rapid focus reduction  
802 neutralization test of influenza A and B viruses in microtiter system. *J Clin Microbiol* 28:  
803 1308–1313.
- 804 [6] Wood JM, Major D, Heath A, Newman RW, Höschler K, Stephenson I, Clark T, Katz  
805 JM, Zambon MC (2012) Reproducibility of serology assays for pandemic influenza H1N1:  
806 Collaborative study to evaluate a candidate WHO International Standard. *Vaccine* 30:  
807 210–217.
- 808 [7] Łuksza M, Lässig M (2014) A predictive fitness model for influenza. *Nature* 507: 57–61.
- 809 [8] Steinbrück L, Klingens TR, McHardy AC (2014) Computational prediction of vaccine strains  
810 for human influenza A (H3N2) viruses. *J Virol* 88: 12123–12132.
- 811 [9] Neher RA, Russell CA, Shraiman BI (2014) Predicting evolution from the shape of ge-  
812 nealogical trees. *Elife* 3: e03568.
- 813 [10] Neher RA, Bedford T, Daniels RS, Russell CA, Shraiman BI (2016) Prediction, dynamics,  
814 and visualization of antigenic phenotypes of seasonal influenza viruses. *Proc Natl Acad Sci*  
815 *USA* 113: E1701–9.
- 816 [11] Lee JM, Huddleston J, Doud MB, Hooper KA, Wu NC, Bedford T, Bloom JD (2018) Deep  
817 mutational scanning of hemagglutinin helps predict evolutionary fates of human H3N2  
818 influenza variants. *Proceedings of the National Academy of Sciences* 115: E8276–E8285.
- 819 [12] Gandon S, Day T, Metcalf CJE, Grenfell BT (2016) Forecasting epidemiological and  
820 evolutionary dynamics of infectious diseases. *Trends Ecol Evol (Amst)* 31: 776–788.
- 821 [13] Morris DH, Gostic KM, Pompei S, Bedford T, Łuksza M, Neher RA, Grenfell BT, Lässig  
822 M, McCauley JW (2017) Predictive modeling of influenza shows the promise of applied  
823 evolutionary biology. *Trends Microbiol* .
- 824 [14] Lässig M, Mustonen V, Walczak AM (2017) Predicting evolution. *Nat Ecol Evol* 1: 77.

- 825 [15] Łuksza M (2020). Personal Communication.
- 826 [16] Shu Y, McCauley J (2017) Gisaid: Global initiative on sharing all influenza data – from  
827 vision to reality. *Eurosurveillance* 22.
- 828 [17] Bush RM, Bender CA, Subbarao K, Cox NJ, Fitch WM (1999) Predicting the evolution of  
829 human influenza A. *Science* 286: 1921–1925.
- 830 [18] Neher RA (2013) Genetic draft, selective interference, and population genetics of rapid  
831 adaptation. *Annual Review of Ecology, Evolution, and Systematics* 44: 195-215.
- 832 [19] Koelle K, Rasmussen DA (2015) The effects of a deleterious mutation load on patterns of  
833 influenza A/H3N2's antigenic evolution in humans. *Elife* 4: e07361.
- 834 [20] Smith DJ, Lapedes AS, de Jong JC, Bestebroer TM, Rimmelzwaan GF, Osterhaus ADME,  
835 Fouchier RAM (2004) Mapping the antigenic and genetic evolution of influenza virus.  
836 *Science* 305: 371–376.
- 837 [21] Bedford T, Suchard MA, Lemey P, Dudas G, Gregory V, Hay AJ, McCauley JW, Russell  
838 CA, Smith DJ, Rambaut A (2014) Integrating influenza antigenic dynamics with molecular  
839 evolution. *Elife* 3: e01914.
- 840 [22] Shih ACC, Hsiao TC, Ho MS, Li WH (2007) Simultaneous amino acid substitutions at  
841 antigenic sites drive influenza A hemagglutinin evolution. *Proceedings of the National  
842 Academy of Sciences* 104: 6283–6288.
- 843 [23] Potter BI, Kondor R, Hadfield J, Huddleston J, Barnes J, Rowe T, Guo L, Xu X, Neher RA,  
844 Bedford T, Wentworth DE (2019) Evolution and rapid spread of a reassortant A(H3N2)  
845 virus that predominated the 2017/2018 influenza season. *Virus Evolution* 5.
- 846 [24] Hadfield J, Megill C, Bell SM, Huddleston J, Potter B, Callender C, Sagulenko P, Bedford  
847 T, Neher RA (2018) Nextstrain: real-time tracking of pathogen evolution. *Bioinformatics* :  
848 bty407.
- 849 [25] Rubner Y, Tomasi C, Guibas LJ (1998) A metric for distributions with applications to  
850 image databases. In: *Sixth International Conference on Computer Vision (IEEE Cat.  
851 No.98CH36271)*. pp. 59-66. doi:10.1109/ICCV.1998.710701.
- 852 [26] Wiley DC, Wilson IA, Skehel JJ (1981) Structural identification of the antibody-binding  
853 sites of Hong Kong influenza haemagglutinin and their involvement in antigenic variation.  
854 *Nature* 289: 373–378.
- 855 [27] Wolf YI, Viboud C, Holmes EC, Koonin EV, Lipman DJ (2006) Long intervals of stasis  
856 punctuated by bursts of positive selection in the seasonal evolution of influenza A virus.  
857 *Biol Direct* 1: 34.
- 858 [28] Koel BF, Burke DF, Bestebroer TM, van der Vliet S, Zondag GCM, Vervaet G, Skepner  
859 E, Lewis NS, Spronken MLJ, Russell CA, Eropkin MY, Hurt AC, Barr IG, de Jong JC,  
860 Rimmelzwaan GF, Osterhaus ADME, Fouchier RAM, Smith DJ (2013) Substitutions near



- 861 the receptor binding site determine major antigenic change during influenza virus evolution.  
862 *Science* 342: 976–979.
- 863 [29] Lee JM, Eguia R, Zost SJ, Choudhary S, Wilson PC, Bedford T, Stevens-Ayers T, Boeckh  
864 M, Hurt AC, Lakdawala SS, Hensley SE, Bloom JD (2019) Mapping person-to-person  
865 variation in viral mutations that escape polyclonal serum targeting influenza hemagglutinin.  
866 *Elife* 8.
- 867 [30] Reich NG, Brooks LC, Fox SJ, Kandula S, McGowan CJ, Moore E, Osthus D, Ray EL,  
868 Tushar A, Yamana TK, Biggerstaff M, Johansson MA, Rosenfeld R, Shaman J (2019) A  
869 collaborative multiyear, multimodel assessment of seasonal influenza forecasting in the  
870 United States. *Proc Natl Acad Sci USA* 116: 3146–3154.
- 871 [31] Rambaut A, Pybus OG, Nelson MI, Viboud C, Taubenberger JK, Holmes EC (2008) The  
872 genomic and epidemiological dynamics of human influenza A virus. *Nature* 453: 615–619.
- 873 [32] Chen YQ, Wohlbold TJ, Zheng NY, Huang M, Huang Y, Neu KE, Lee J, Wan H, Rojas  
874 KT, Kirkpatrick E, Henry C, Palm AKE, Stamper CT, Lan LYL, Topham DJ, Treanor J,  
875 Wrammert J, Ahmed R, Eichelberger MC, Georgiou G, Krammer F, Wilson PC (2018)  
876 Influenza infection in humans induces broadly cross-reactive and protective neuraminidase-  
877 reactive antibodies. *Cell* 173: 417–429.e10.
- 878 [33] Villa M, Lässig M (2017) Fitness cost of reassortment in human influenza. *PLoS Pathog*  
879 13: e1006685.
- 880 [34] Russell CA, Jones TC, Barr IG, Cox NJ, Garten RJ, Gregory V, Gust ID, Hampson AW,  
881 Hay AJ, Hurt AC, de Jong JC, Kelso A, Klimov AI, Kageyama T, Komadina N, Lapedes  
882 AS, Lin YP, Mosterin A, Obuchi M, Odagiri T, Osterhaus ADME, Rimmelzwaan GF,  
883 Shaw MW, Skepner E, Stohr K, Tashiro M, Fouchier RAM, Smith DJ (2008) The global  
884 circulation of seasonal influenza A (H3N2) viruses. *Science* 320: 340–346.
- 885 [35] Bedford T, Riley S, Barr IG, Broor S, Chadha M, Cox NJ, Daniels RS, Gunasekaran  
886 CP, Hurt AC, Kelso A, Klimov A, Lewis NS, Li X, McCauley JW, Odagiri T, Potdar V,  
887 Rambaut A, Shu Y, Skepner E, Smith DJ, Suchard MA, Tashiro M, Wang D, Xu X, Lemey  
888 P, Russell CA (2015) Global circulation patterns of seasonal influenza viruses vary with  
889 antigenic drift. *Nature* 523: 217–220.
- 890 [36] Köster J, Rahmann S (2012) Snakemake—a scalable bioinformatics workflow engine. *Bioin-*  
891 *formatics* 28: 2520–2522.
- 892 [37] Jariani A, Warth C, Deforche K, Libin P, Drummond AJ, Rambaut A, Matsen IV FA,  
893 Theys K (2019) SANTA-SIM: simulating viral sequence evolution dynamics under selection  
894 and recombination. *Virus Evolution* 5.
- 895 [38] Katoh K, Misawa K, Kuma K, Miyata T (2002) MAFFT: a novel method for rapid multiple  
896 sequence alignment based on fast Fourier transform. *Nucleic Acids Research* 30: 3059–3066.

- 897 [39] Nguyen LT, Schmidt HA, von Haeseler A, Minh BQ (2014) IQ-TREE: A Fast and Effective  
898 Stochastic Algorithm for Estimating Maximum-Likelihood Phylogenies. *Molecular Biology  
899 and Evolution* 32: 268-274.
- 900 [40] Sagulenko P, Puller V, Neher RA (2018) TreeTime: Maximum-likelihood phylodynamic  
901 analysis. *Virus Evolution* 4.
- 902 [41] Kusner MJ, Sun Y, Kolkin NI, Weinberger KQ (2015) From word embeddings to document  
903 distances. In: *Proceedings of the 32Nd International Conference on International Conference  
904 on Machine Learning - Volume 37. JMLR.org, ICML'15*, pp. 957–966. URL [http://dl.  
905 acm.org/citation.cfm?id=3045118.3045221](http://dl.acm.org/citation.cfm?id=3045118.3045221).
- 906 [42] Bradski G (2000) The OpenCV Library. *Dr Dobb's Journal of Software Tools* .
- 907 [43] Jones E, Oliphant T, Peterson P, et al. (2001–). SciPy: Open source scientific tools for  
908 Python. URL <http://www.scipy.org/>. [Online; accessed July 16, 2019].
- 909 [44] van der Maaten L, Hinton G (2008) Visualizing data using t-SNE. *Journal of Machine  
910 Learning Research* 9: 2579–2605.
- 911 [45] Ester M, Kriegel HP, Sander J, Xu X (1996) A density-based algorithm for discovering  
912 clusters a density-based algorithm for discovering clusters in large spatial databases with  
913 noise. In: *Proceedings of the Second International Conference on Knowledge Discovery and  
914 Data Mining. AAAI Press, KDD'96*, pp. 226–231. URL [http://dl.acm.org/citation.  
915 cfm?id=3001460.3001507](http://dl.acm.org/citation.cfm?id=3001460.3001507).

## 916 Supplemental Material

### 917 Supplemental Figures

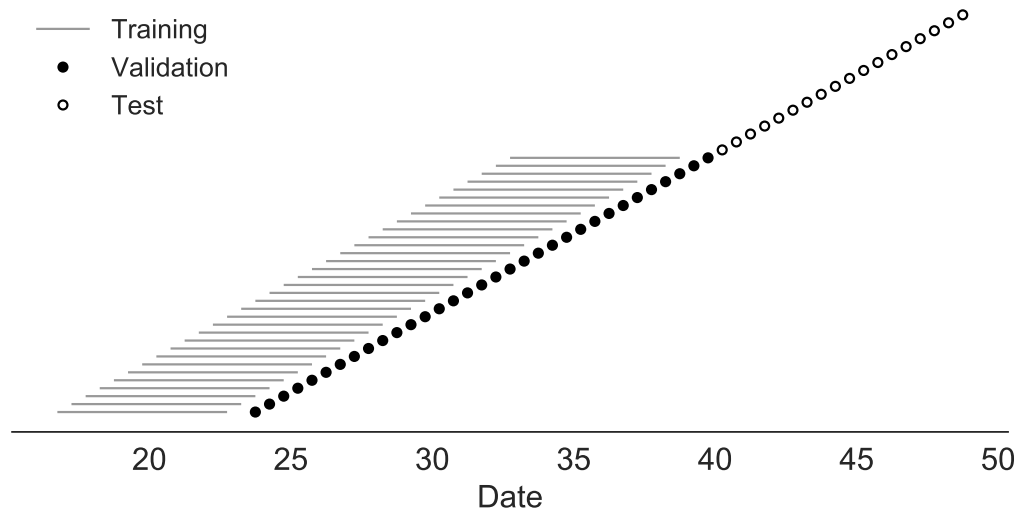

**Figure S1.** Time-series cross-validation scheme for simulated populations. Models were trained in six-year sliding windows (gray lines) and validated on out-of-sample data from validation timepoints (filled circles). Validation results from 30 years of data were used to iteratively tune model hyperparameters. After fixing hyperparameters, model coefficients were fixed at the mean values across all training windows. Fixed coefficients were applied to 9 years of new out-of-sample test data (open circles) to estimate true forecast errors.

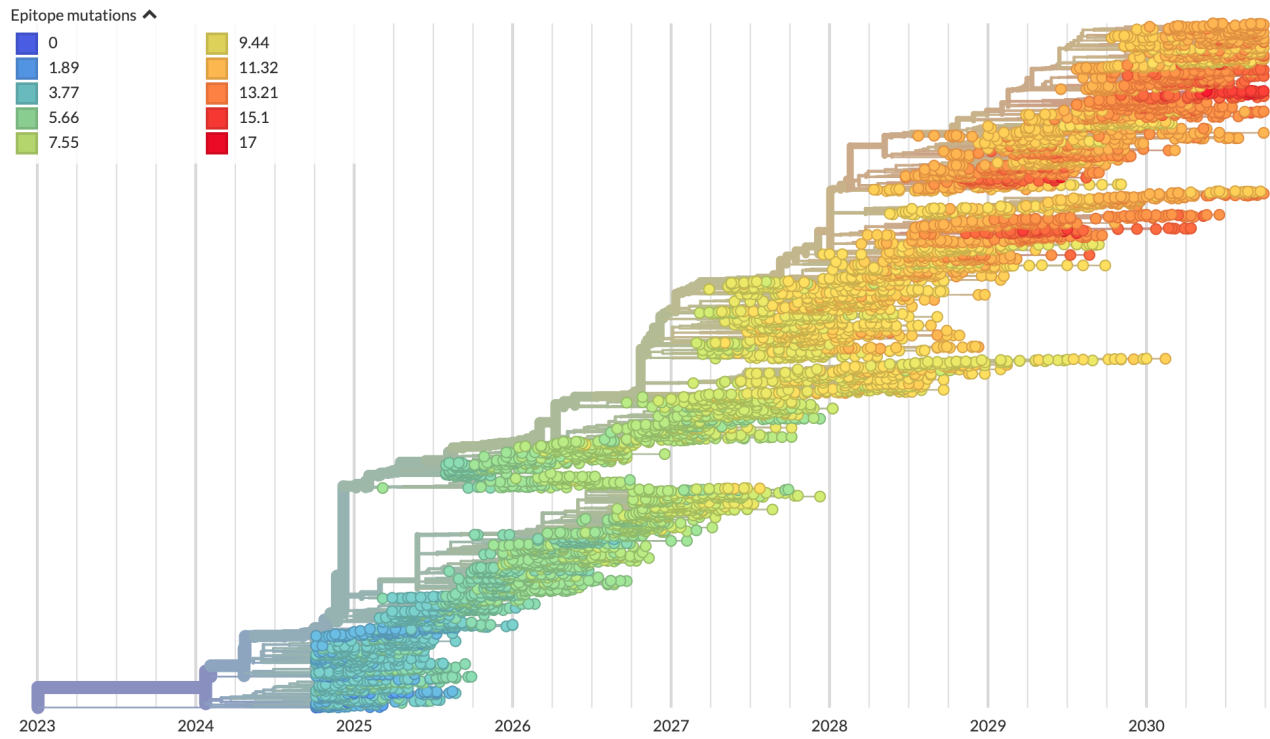

**Figure S2.** Phylogeny of H3N2-like HA sequences sampled between the 24th and 30th years of simulated evolution. The phylogenetic structure and rate of accumulated epitope and non-epitope mutations match patterns observed in phylogenies of natural sequences. Sample dates were annotated as the generation in the simulation divided by 200 and added to 2000, to acquire realistic date ranges that were compatible with our modeling machinery.

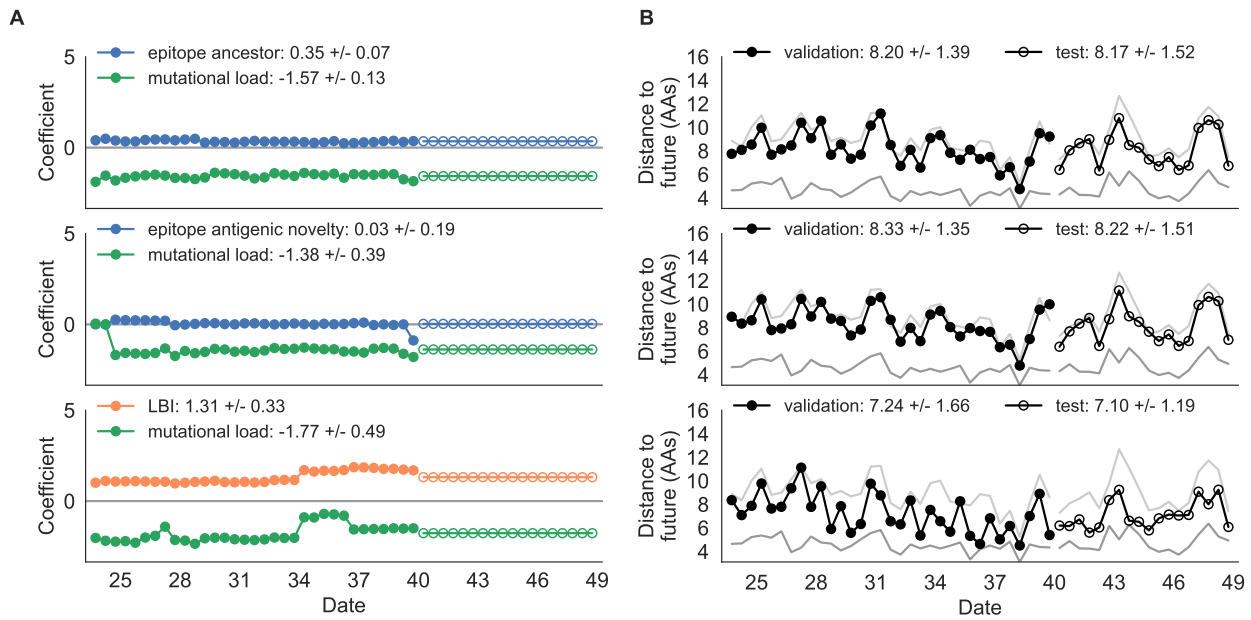

**Figure S3.** Composite model coefficients and distances to the future for models fit to simulated populations. A) Coefficients and B) distances are shown per validation timepoint and test timepoint as in Fig. 2.

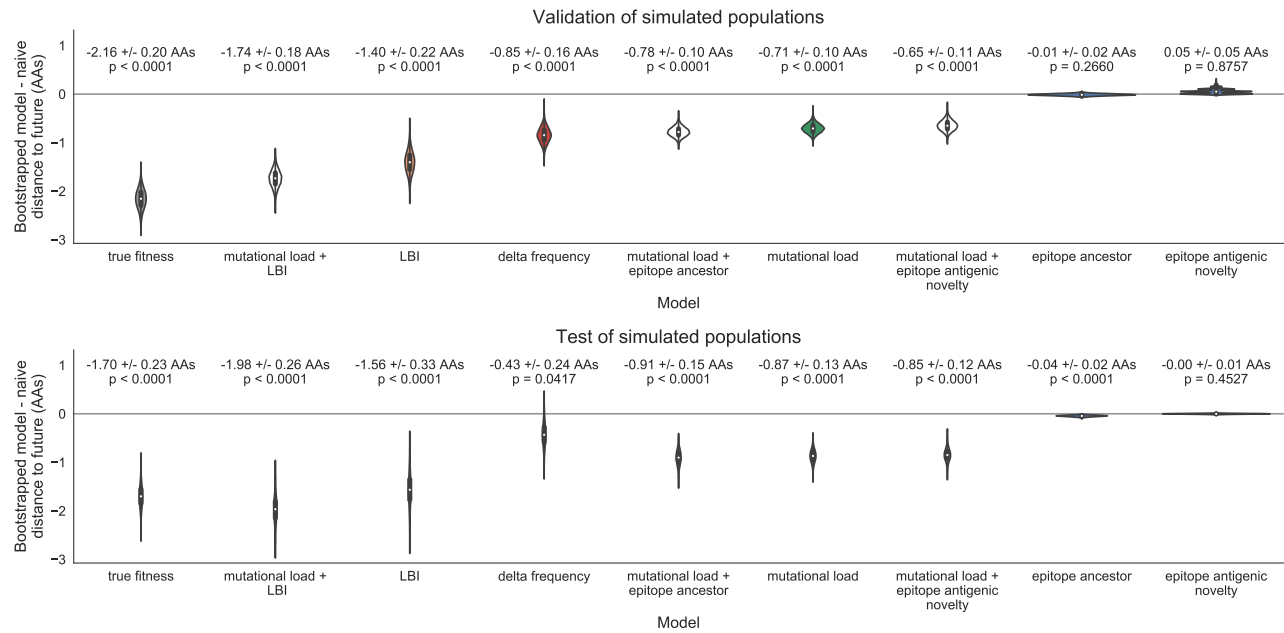

**Figure S4.** Bootstrap distributions of the mean difference of distances to the future between biologically-informed and naive models for simulated populations. Empirical differences in distances to the future were sampled with replacement and mean values for each bootstrap sample were calculated across  $n=10,000$  bootstrap iterations. The horizontal gray line indicates a difference of zero between a given model and its corresponding naive model. Each model is annotated by the mean  $\pm$  the standard deviation of the bootstrap distribution. Models are also annotated by the p-value representing the proportion of bootstrap samples with values less than zero (see Methods).

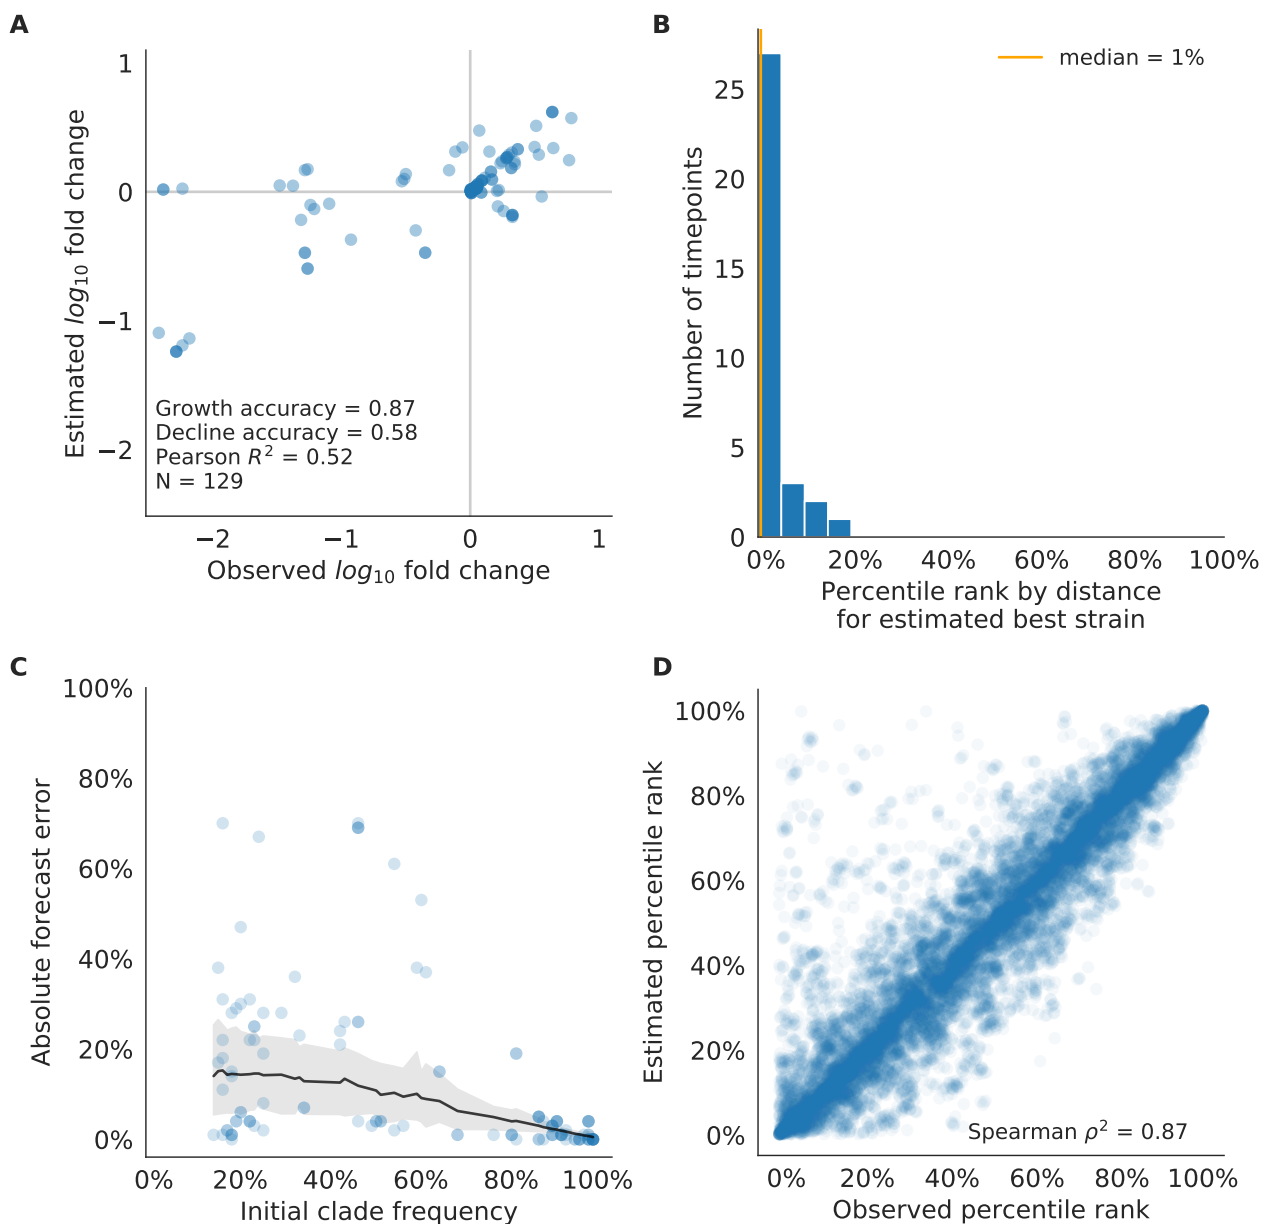

**Figure S5.** Validation of best model for simulated populations of H3N2-like viruses. A) The correlation of estimated and observed clade frequency fold changes shows the model's ability to capture clade-level dynamics without explicitly optimizing for clade frequency targets. B) The rank of the estimated best strain based on its distance to the future for 33 timepoints. The estimated best strain was in the top 20th percentile of observed closest strains for 100% of timepoints, confirming that the model makes a good choice when forced to select a single representative strain for the future population. C) Absolute forecast error for clades shown in A by their initial frequency with a mean LOESS fit (solid black line) and 95% confidence intervals (gray shading) based on 100 bootstraps. D) The correlation of all strains at all timepoints by the percentile rank of their observed and estimated distances to the future. The corresponding results for the naive model are shown in Supplemental Fig. S6.

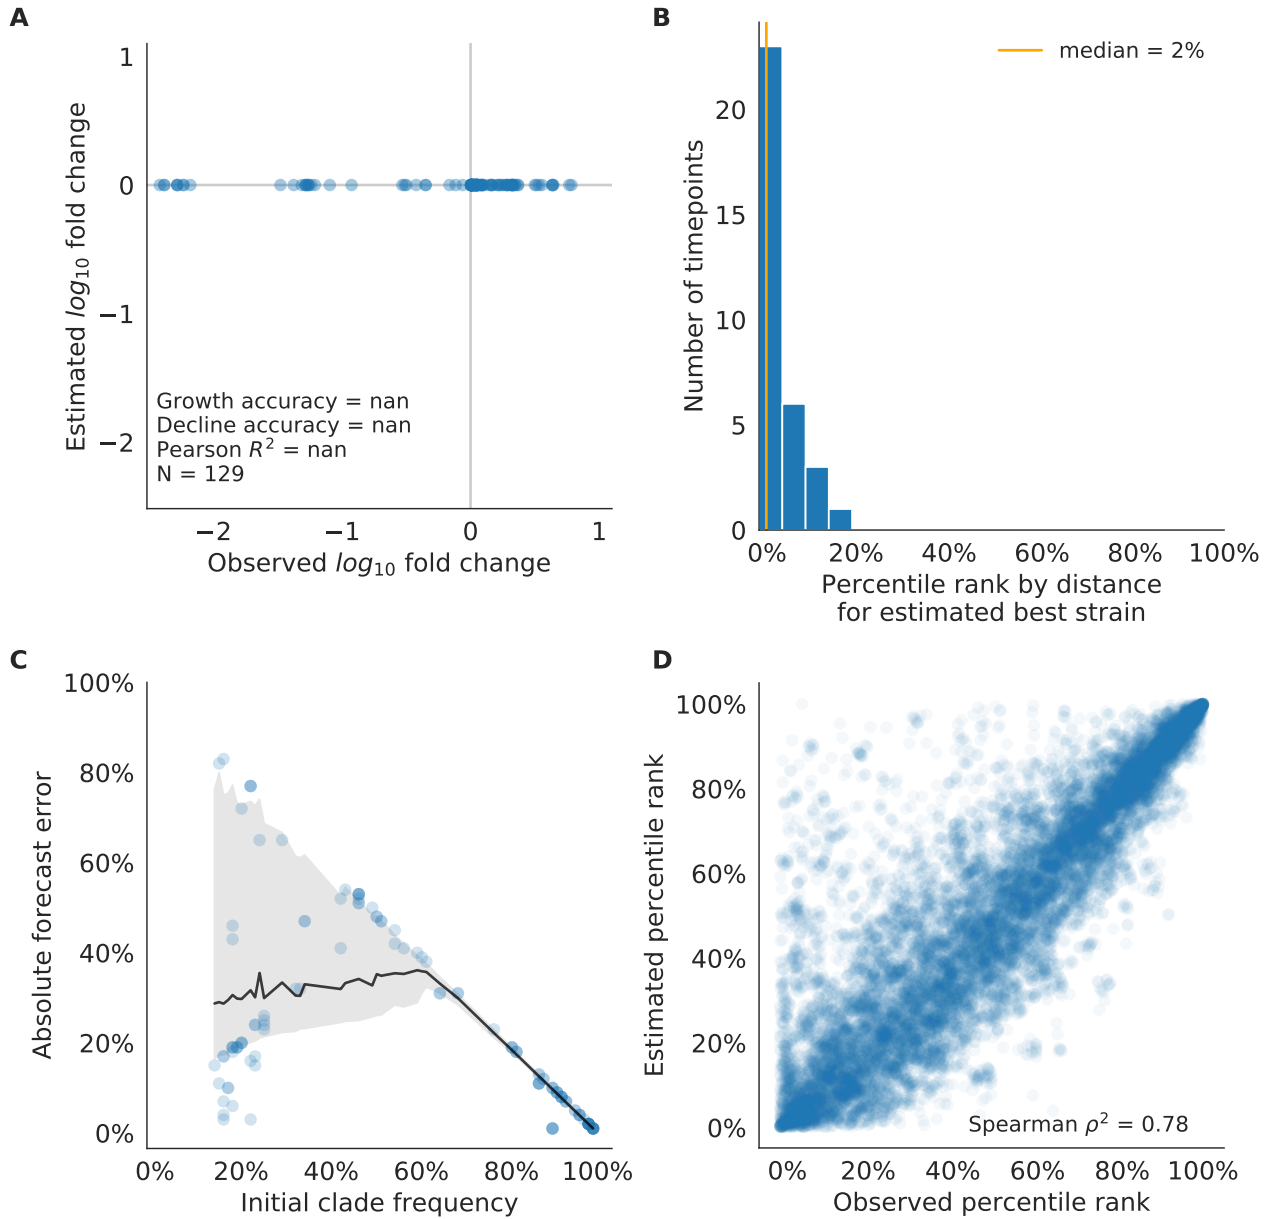

**Figure S6.** Validation of naive model for simulated populations of H3N2-like viruses as in Supplemental Fig. S5. Note that the naive model sets future frequencies to current frequencies such that there is no estimated fold change in frequencies for the first panel.



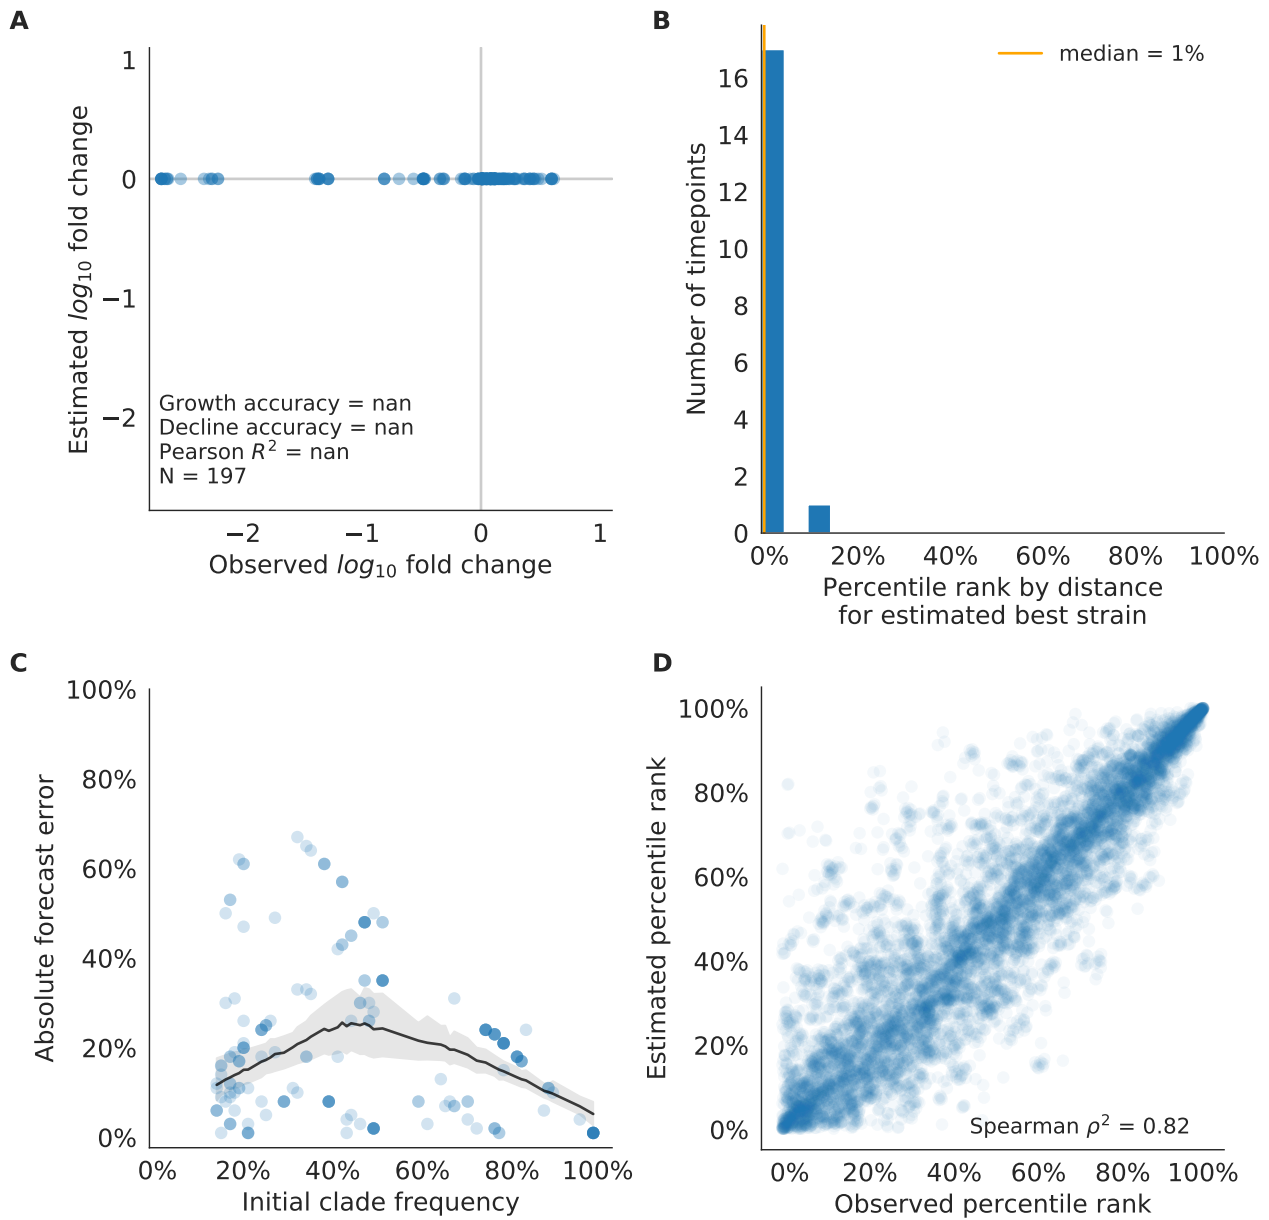

**Figure S7.** Test of naive model for simulated populations of H3N2-like viruses as in Supplemental Fig. S5. Note that the naive model sets future frequencies to current frequencies such that there is no estimated fold change in frequencies for the first panel.

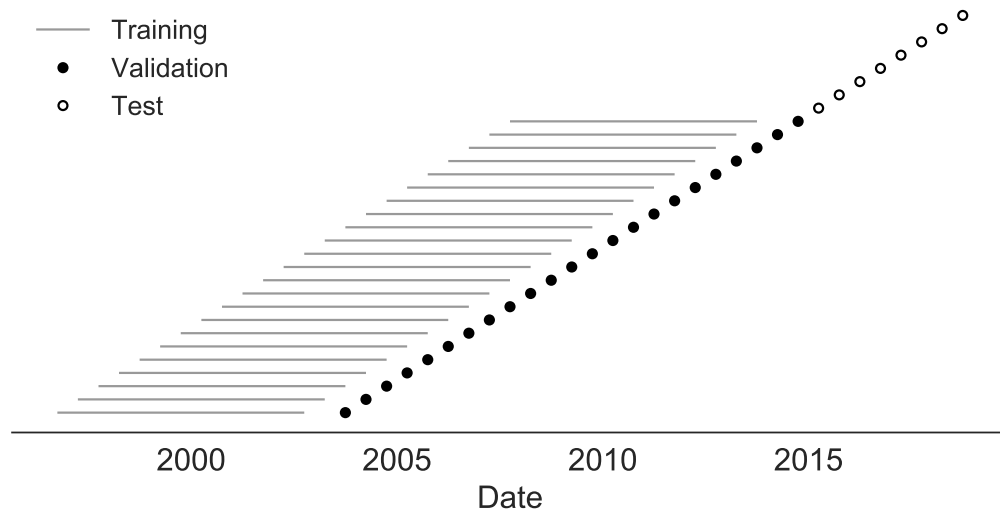

**Figure S8.** Time-series cross-validation scheme for natural populations. Models were trained in six-year sliding windows (gray lines) and validated on out-of-sample data from validation timepoints (filled circles). Validation results from 25 years of data were used to iteratively tune model hyperparameters. After fixing hyperparameters, model coefficients were fixed at the mean values across all training windows. Fixed coefficients were applied to four years of new out-of-sample test data (open circles) to estimate true forecast errors.

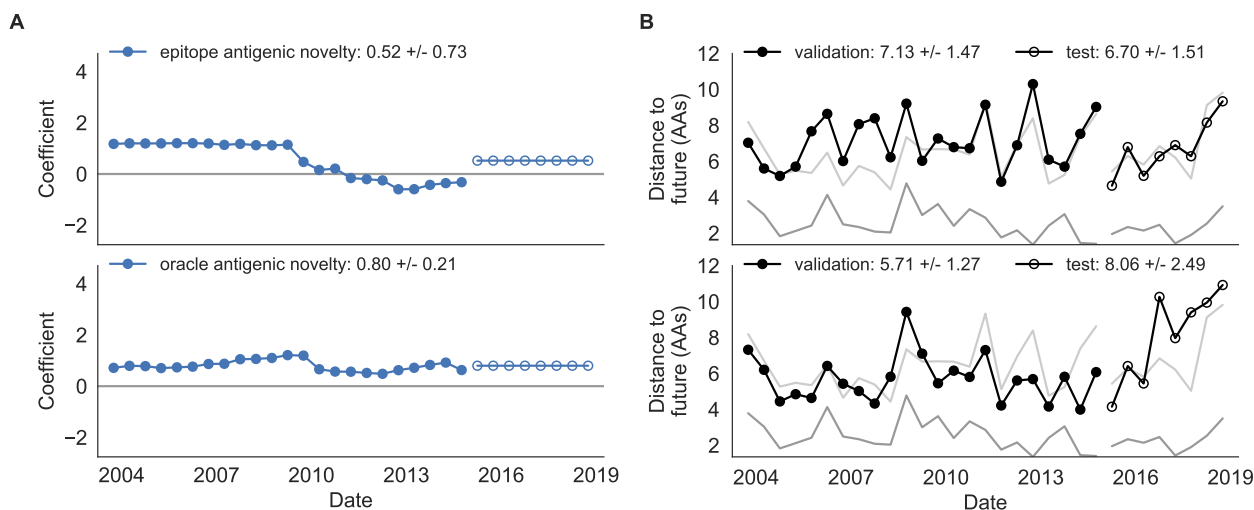

**Figure S9.** Model coefficients and distances to the future for antigenic novelty models fit to natural populations. A) Coefficients and B) distances are shown per validation timepoint and test timepoint as in Fig. 2. The epitope antigenic novelty model relies on previously published epitope sites [7]. The “oracle” antigenic novelty model relies on sites of beneficial mutations that were manually identified from the entire training and validation time period (Methods). The improved performance of the “oracle” model indicates that the sequence-based antigenic novelty metric can be effective when sites of beneficial mutations are known prior to forecasting.

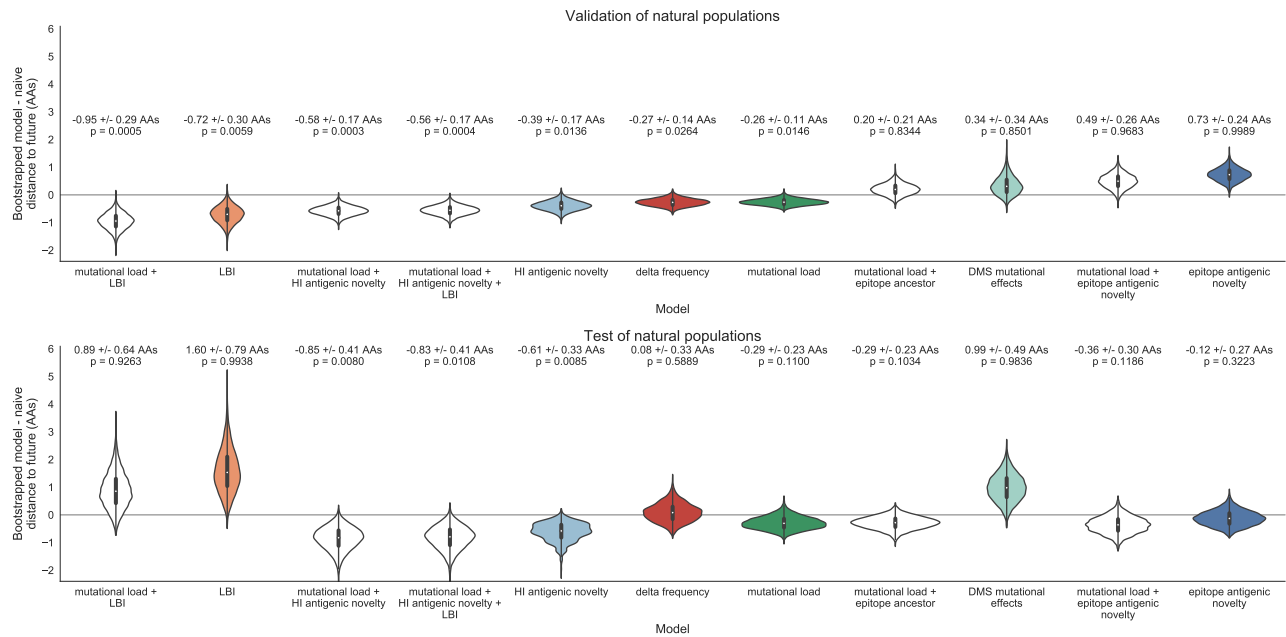

**Figure S10.** Bootstrap distributions of the mean difference of distances to the future between biologically-informed and naive models for natural populations. Empirical differences in distances to the future were sampled with replacement and mean values for each bootstrap sample were calculated across  $n=10,000$  bootstrap iterations. The horizontal gray line indicates a difference of zero between a given model and its corresponding naive model. Each model is annotated by the mean  $\pm$  the standard deviation of the bootstrap distribution. Models are also annotated by the p-value representing the proportion of bootstrap samples with values less than zero (see Methods).

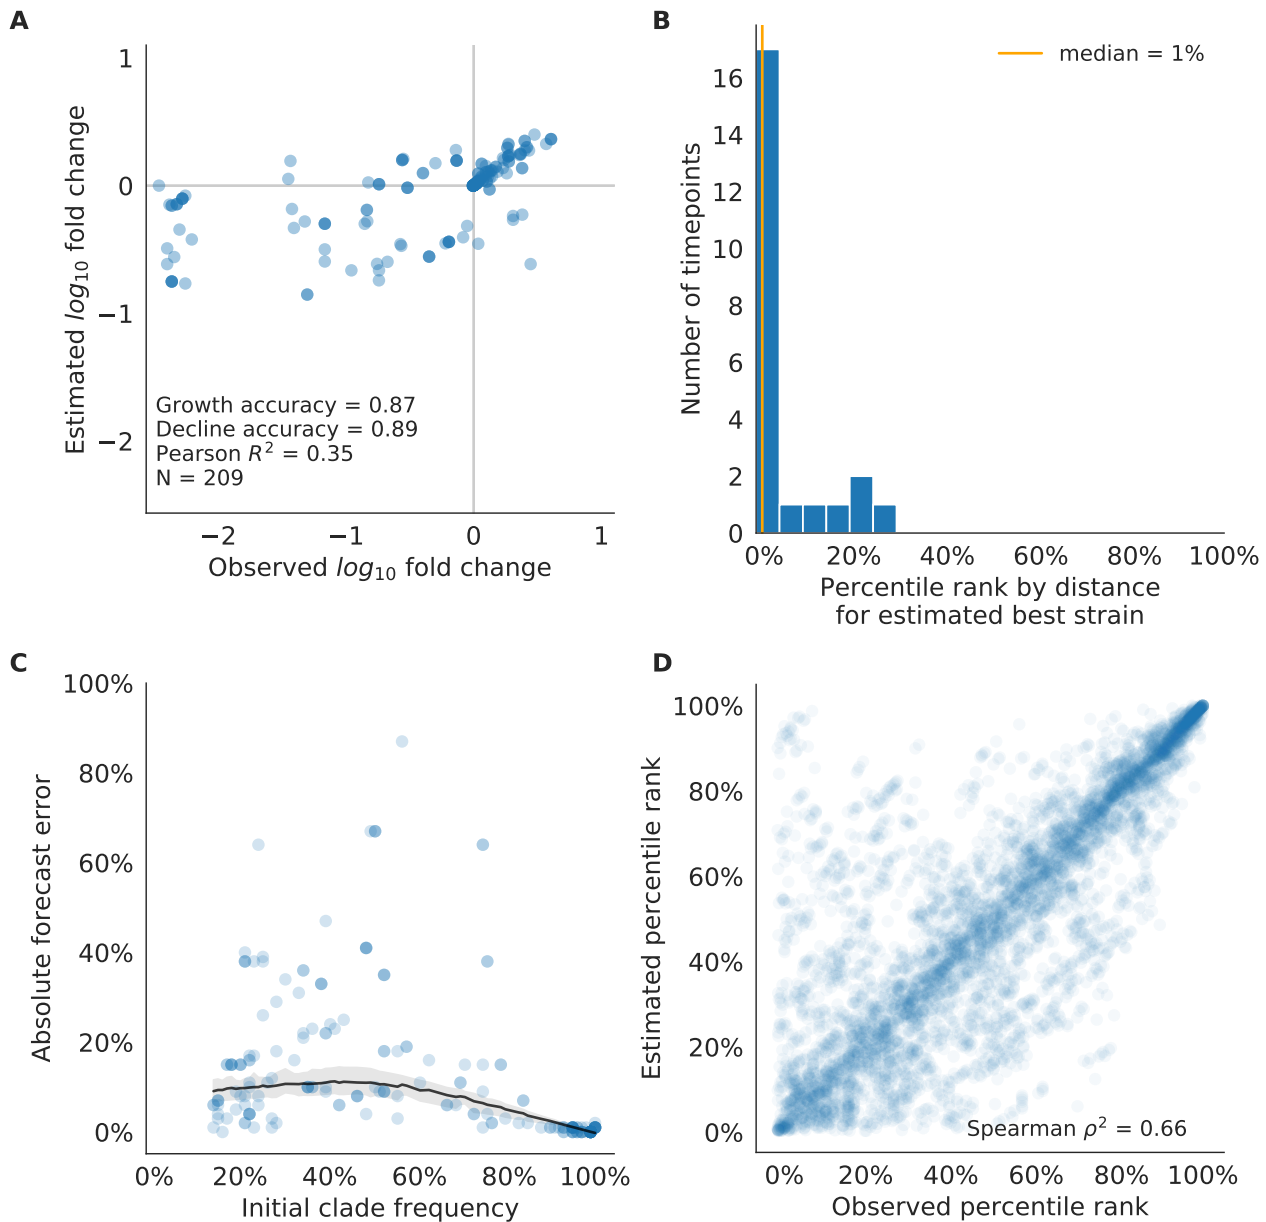

**Figure S11.** Validation of best model for natural populations of H3N2 viruses, the composite model of mutational load and LBI. A) The correlation of estimated and observed clade frequency fold changes shows the model's ability to capture clade-level dynamics without explicitly optimizing for clade frequency targets. B) The rank of the estimated best strain based on its distance to the future for 23 timepoints. The estimated best strain was in the top 20th percentile of observed closest strains for 87% of timepoints, confirming that the model makes a good choice when forced to select a single representative strain for the future population. C) Absolute forecast error for clades shown in A by their initial frequency with a mean LOESS fit (solid black line) and 95% confidence intervals (gray shading) based on 100 bootstraps. D) The correlation of all strains at all timepoints by the percentile rank of their observed and estimated distances to the future. The corresponding results for the naive model are shown in Supplemental Fig. S12.

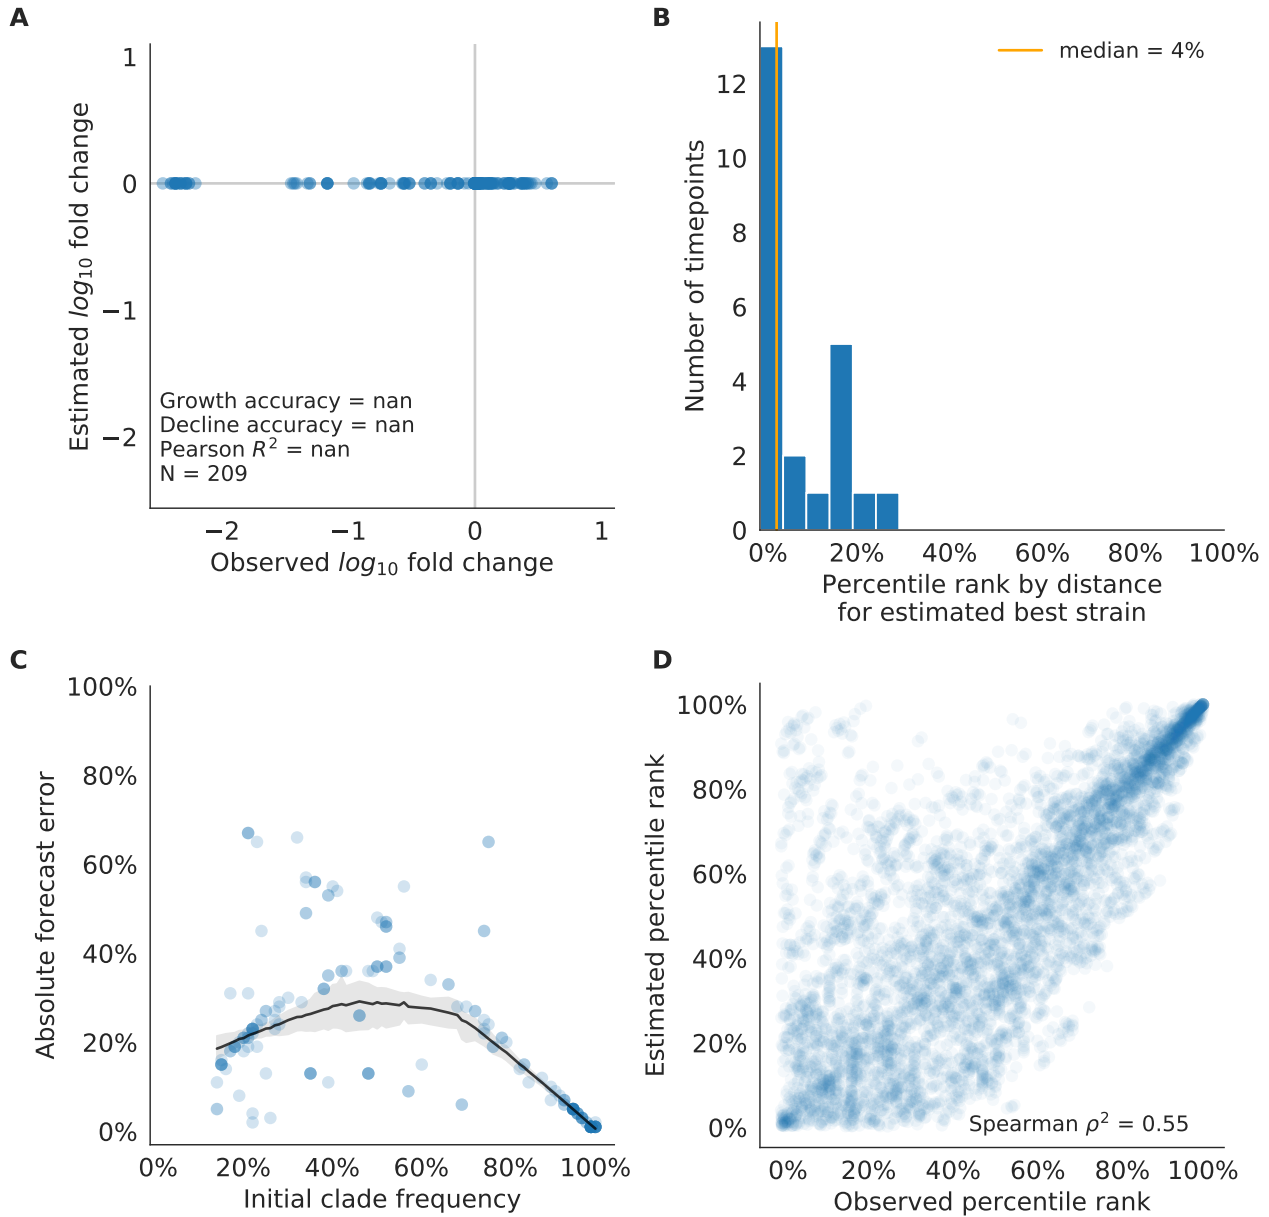

**Figure S12.** Validation of naive model for natural populations of H3N2 viruses as in Supplemental Fig. S5. Note that the naive model sets future frequencies to current frequencies such that there is no estimated fold change in frequencies for the first panel.

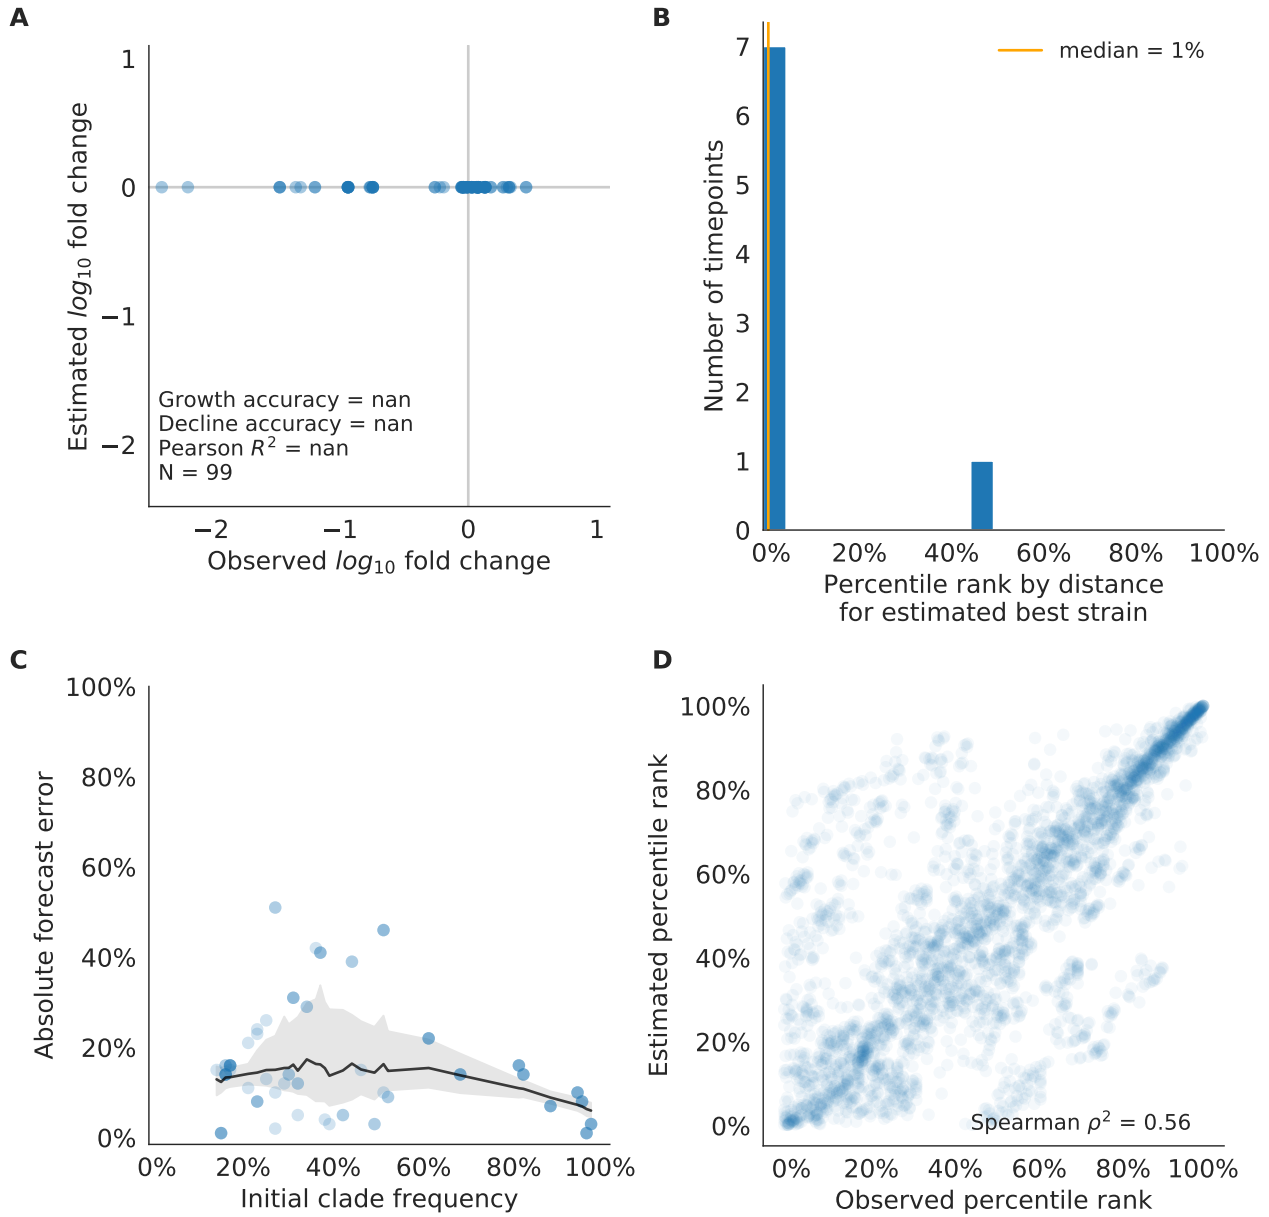

**Figure S13.** Test of naive model for natural populations of H3N2 viruses as in Supplemental Fig. S5. Note that the naive model sets future frequencies to current frequencies such that there is no estimated fold change in frequencies for the first panel.

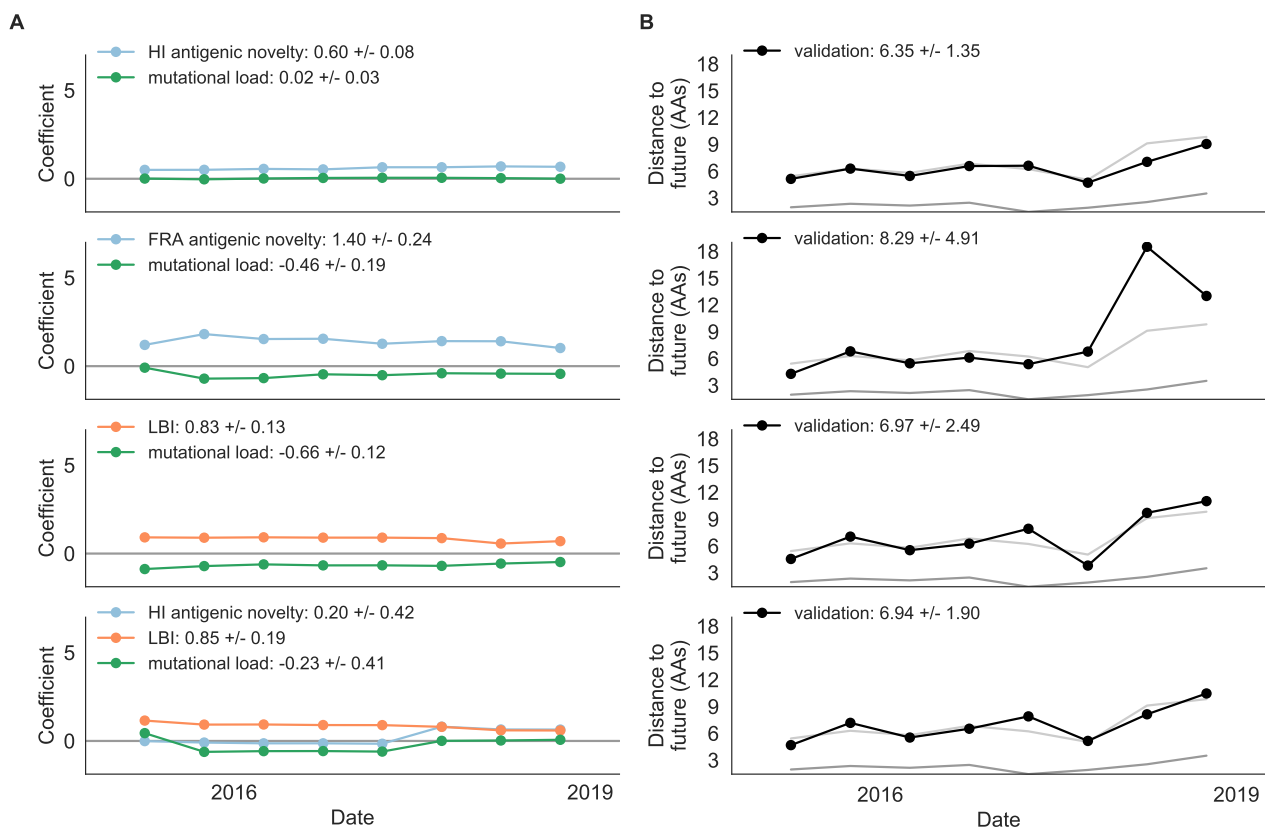

**Figure S14.** Model coefficients and distances to the future for best composite models and a FRA-based composite fit to recent data from natural populations as in Fig. 2. A) Coefficients and B) distances are shown per test timepoint ( $N=8$ ). In contrast to the results for these models based on fixed coefficients from training/validation, these coefficients were learned for each six-year window prior to the corresponding test timepoint. The corresponding distances reflect the model’s performance with updated coefficients on what is effectively new validation data. The naive model’s distance to the future was  $6.82 \pm 1.74$  AAs for these timepoints.

918 **Supplemental Tables**

| branch type | epitope mutations | non-epitope mutations | epitope-to-non-epitope ratio |
|-------------|-------------------|-----------------------|------------------------------|
| side branch | 590               | 1327                  | 0.44                         |
| trunk       | 23                | 12                    | 1.92                         |

**Table S1.** Number of epitope and non-epitope mutations per branch by trunk or side branch status for simulated populations. Epitope sites were defined previously described [7]. Annotation of trunk and side branch was performed as previously described [35]. Mutations were calculated for the full validation tree for simulated sequences samples between October of years 10 and 40.



| branch type | epitope mutations | non-epitope mutations | epitope-to-non-epitope ratio |
|-------------|-------------------|-----------------------|------------------------------|
| side branch | 485               | 1177                  | 0.41                         |
| trunk       | 50                | 32                    | 1.56                         |

**Table S2.** Number of epitope and non-epitope mutations per branch by trunk or side branch status for natural populations. Epitope sites were defined previously described [7]. Annotation of trunk and side branch was performed as previously described [35]. Mutations were calculated for the full validation tree for natural sequences samples between 1990 and 2015.

| Model                          | Coefficients   | Distance to future (AAs)   |                            | Model > naive |         |
|--------------------------------|----------------|----------------------------|----------------------------|---------------|---------|
|                                |                | Validation                 | Test                       | Validation    | Test    |
| mutational load                | -0.68 +/- 0.34 | 5.44 +/- 1.80*             | 7.70 +/- 3.53              | 18 (78%)      | 4 (50%) |
| + LBI                          | 1.03 +/- 0.40  |                            |                            |               |         |
| LBI                            | 1.12 +/- 0.51  | 5.68 +/- 1.91*             | 8.40 +/- 3.97              | 17 (74%)      | 2 (25%) |
| oracle antigenic novelty       | 0.80 +/- 0.21  | 5.71 +/- 1.27 <sup>^</sup> | 8.06 +/- 2.49 <sup>^</sup> | 18 (78%)      | 2 (25%) |
| HI antigenic novelty           | 0.89 +/- 0.23  | 5.82 +/- 1.50*             | 5.97 +/- 1.47*             | 17 (74%)      | 6 (75%) |
| + mutational load              | -1.01 +/- 0.42 |                            |                            |               |         |
| HI antigenic novelty           | 0.90 +/- 0.23  | 5.84 +/- 1.51*             | 5.99 +/- 1.46*             | 16 (70%)      | 6 (75%) |
| + mutational load              | -1.00 +/- 0.44 |                            |                            |               |         |
| + LBI                          | -0.04 +/- 0.09 |                            |                            |               |         |
| HI antigenic novelty           | 0.83 +/- 0.20  | 6.01 +/- 1.50*             | 6.21 +/- 1.44*             | 16 (70%)      | 7 (88%) |
| delta frequency                | 0.79 +/- 0.47  | 6.13 +/- 1.71*             | 6.90 +/- 2.30              | 16 (70%)      | 5 (62%) |
| mutational load                | -0.99 +/- 0.30 | 6.14 +/- 1.37*             | 6.53 +/- 1.39              | 17 (74%)      | 6 (75%) |
| Koel epitope antigenic novelty | 0.28 +/- 0.36  | 6.22 +/- 1.26 <sup>^</sup> | 6.72 +/- 1.51 <sup>^</sup> | 18 (78%)      | 4 (50%) |
| naive                          | 0.00 +/- 0.00  | 6.40 +/- 1.36              | 6.82 +/- 1.74              | 0 (0%)        | 0 (0%)  |
| DMS entropy                    | -0.03 +/- 0.10 | 6.40 +/- 1.36 <sup>^</sup> | 6.81 +/- 1.73 <sup>^</sup> | 9 (39%)       | 6 (75%) |
| DMS mutational load            | -0.02 +/- 0.13 | 6.45 +/- 1.42 <sup>^</sup> | 6.82 +/- 1.73 <sup>^</sup> | 7 (30%)       | 5 (62%) |
| epitope ancestor               | 0.53 +/- 0.52  | 6.60 +/- 1.34              | 6.53 +/- 1.51              | 12 (52%)      | 4 (50%) |
| + mutational load              | -0.77 +/- 0.32 |                            |                            |               |         |
| DMS mutational effects         | 1.25 +/- 0.84  | 6.75 +/- 1.95              | 7.80 +/- 2.97              | 11 (48%)      | 4 (50%) |
| Wolf epitope antigenic novelty | 0.31 +/- 0.51  | 6.83 +/- 1.30 <sup>^</sup> | 6.97 +/- 1.41 <sup>^</sup> | 4 (17%)       | 3 (38%) |
| epitope ancestor               | 0.23 +/- 0.51  | 6.89 +/- 1.39 <sup>^</sup> | 6.82 +/- 1.67 <sup>^</sup> | 8 (35%)       | 4 (50%) |
| epitope antigenic novelty      | 0.57 +/- 0.77  | 6.89 +/- 1.42              | 6.46 +/- 1.31              | 7 (30%)       | 4 (50%) |
| + mutational load              | -0.77 +/- 0.27 |                            |                            |               |         |
| epitope antigenic novelty      | 0.52 +/- 0.73  | 7.13 +/- 1.47              | 6.70 +/- 1.51              | 7 (30%)       | 5 (62%) |

**Table S3.** All model coefficients and performance on validation and test data for natural populations ordered from best to worst by distance to the future, as in Table 1. Distances annotated with asterisks (\*) were significantly closer to the future than the naive model as measured by bootstrap tests (see Methods and Supplemental Fig. S10). Distances annotated with carets (^) were not tested for significance relative to the naive model. Validation results are based on 23 timepoints. Test results are based on eight timepoints not observed during model training and validation. Model results for additional variants of fitness metrics including those based on epitope mutations and DMS preferences are included for reference.

| sample    | error_type | individual_model     | composite_model                        | bootstrap_mean | bootstrap_std | p_value |
|-----------|------------|----------------------|----------------------------------------|----------------|---------------|---------|
| simulated | validation | true fitness         | mutational load + LBI                  | 0.42           | 0.23          | 0.9644  |
| simulated | validation | mutational load      | mutational load + LBI                  | -1.03          | 0.21          | <0.0001 |
| simulated | validation | LBI                  | mutational load + LBI                  | -0.33          | 0.14          | 0.0091  |
| simulated | test       | true fitness         | mutational load + LBI                  | -0.28          | 0.26          | 0.1392  |
| simulated | test       | mutational load      | mutational load + LBI                  | -1.11          | 0.25          | <0.0001 |
| simulated | test       | LBI                  | mutational load + LBI                  | -0.42          | 0.16          | 0.0001  |
| natural   | validation | mutational load      | mutational load + LBI                  | -0.69          | 0.28          | 0.0036  |
| natural   | validation | LBI                  | mutational load + LBI                  | -0.23          | 0.09          | 0.0025  |
| natural   | validation | mutational load      | mutational load + HI antigenic novelty | -0.31          | 0.18          | 0.0417  |
| natural   | validation | HI antigenic novelty | mutational load + HI antigenic novelty | -0.18          | 0.11          | 0.0513  |
| natural   | test       | mutational load      | mutational load + LBI                  | 1.19           | 0.79          | 0.9432  |
| natural   | test       | LBI                  | mutational load + LBI                  | -0.70          | 0.24          | <0.0001 |
| natural   | test       | mutational load      | mutational load + HI antigenic novelty | -0.56          | 0.33          | 0.0133  |
| natural   | test       | HI antigenic novelty | mutational load + HI antigenic novelty | -0.24          | 0.18          | 0.0999  |

**Table S4.** Comparison of composite and individual model distances to the future by bootstrap test (see Methods). The effect size of differences between models in amino acids is given by the mean and standard deviation of the bootstrap distributions. The p values represent the proportion of n=10,000 bootstrap samples where the mean difference was greater than or equal to zero.

## 919 Supplemental Text

### 920 GISAID Acknowledgements

921 WHO Collaborating Centre for Reference and Research on Influenza, Victorian Infectious  
922 Diseases Reference Laboratory, Australia; WHO Collaborating Centre for Reference and Research  
923 on Influenza, Chinese National Influenza Center, China; WHO Collaborating Centre for Reference  
924 and Research on Influenza, National Institute of Infectious Diseases, Japan; The Crick Worldwide  
925 Influenza Centre, The Francis Crick Institute, United Kingdom; WHO Collaborating Centre  
926 for the Surveillance, Epidemiology and Control of Influenza, Centers for Disease Control  
927 and Prevention, United States; ADImmune Corporation, Taiwan; ADPH Bureau of Clinical  
928 Laboratories, United States; Aichi Prefectural Institute of Public Health, Japan; Akershus  
929 University Hospital, Norway; Akita Research Center for Public Health and Environment, Japan;  
930 Alabama State Laboratory, United States; Alaska State Public Health Laboratory, United  
931 States; Alaska State Virology Lab, United States; Aomori Prefectural Institute of Public Health  
932 and Environment, Japan; Aristotelian University of Thessaloniki, Greece; Arizona Department  
933 of Health Services, United States; Arkansas Children's Hospital, United States; Arkansas  
934 Department of Health, United States; Auckland Healthcare, New Zealand; Auckland Hospital,  
935 New Zealand; Austin Health, Australia; Baylor College of Medicine, United States; California  
936 Department of Health Services, United States; Canberra Hospital, Australia; Cantacuzino  
937 Institute, Romania; Canterbury Health Services, New Zealand; Caribbean Epidemiology Center,  
938 Trinidad and Tobago; CDC GAP Nigeria, Nigeria; CDC-Kenya, Kenya; CEMIC University  
939 Hospital, Argentina; CENETROP, Bolivia, Plurinational State of; Center for Disease Control,  
940 Taiwan; Center for Public Health and Environment, Hiroshima Prefectural Technology Research  
941 Institute, Japan; Central Health Laboratory, Mauritius; Central Laboratory of Public Health,  
942 Paraguay; Central Public Health Laboratory, Ministry of Health, Oman; Central Public Health  
943 Laboratory, Palestinian Territory; Central Public Health Laboratory, Papua New Guinea;  
944 Central Research Institute for Epidemiology, Russian Federation; Centre for Diseases Control  
945 and Prevention, Armenia; Centre for Infections, Health Protection Agency, United Kingdom;  
946 Centre Pasteur du Cameroun, Cameroon; Chiba City Institute of Health and Environment,  
947 Japan; Chiba Prefectural Institute of Public Health, Japan; Childrens Hospital Westmead,  
948 Australia; Chuuk State Hospital, Micronesia, Federated States of; City of El Paso Dept of  
949 Public Health, United States; Clinical Virology Unit, CDIM, Australia; Colorado Department of  
950 Health Lab, United States; Connecticut Department. of Public Health, United States; Contiguo  
951 a Hospital Rosales, El Salvador; Croatian Institute of Public Health , Croatia; CRR virus  
952 Influenza region Sud, France; CRR virus Influenza region Sud, Guyana; CSL Ltd, United  
953 States; Dallas County Health and Human Services, United States; DC Public Health Lab,  
954 United States; Delaware Public Health Lab, United States; Departamento de Laboratorio de  
955 Salud Publica, Uruguay; Department of Virology, Medical University Vienna, Austria; Disease  
956 Investigation Centre Wates (BBVW), Australia; Drammen Hospital / Vestreviken HF, Norway;  
957 Ehime Prefecture Institute of Public Health and Environmental Science, Japan; Erasmus Medical  
958 Center, Netherlands; Erasmus University of Rotterdam, Netherlands; Ethiopian Health and  
959 Nutrition Research Institute (EHNRI), Ethiopia; Evanston Hospital and NorthShore University,  
960 United States; Facultad de Medicina, Spain; Fiji Centre for Communicable Disease Control,

961 Fiji; Florida Department of Health, United States; Fukui Prefectural Institute of Public Health,  
962 Japan; Fukuoka City Institute for Hygiene and the Environment, Japan; Fukuoka Institute  
963 of Public Health and Environmental Sciences, Japan; Fukushima Prefectural Institute of  
964 Public Health, Japan; Gart Naval General Hospital, United Kingdom; Georgia Public Health  
965 Laboratory, United States; Gifu Municipal Institute of Public Health, Japan; Gifu Prefectural  
966 Institute of Health and Environmental Sciences, Japan; Government Virus Unit, Hong Kong;  
967 Gunma Prefectural Institute of Public Health and Environmental Sciences, Japan; Hamamatsu  
968 City Health Environment Research Center, Japan; Haukeland University Hospital, Dept. of  
969 Microbiology, Norway; Headquarters British Gurkhas Nepal, Nepal; Health Forde, Department  
970 of Microbiology, Norway; Health Protection Agency, United Kingdom; Health Protection  
971 Inspectorate, Estonia; Hellenic Pasteur Institute, Greece; Hiroshima City Institute of Public  
972 Health, Japan; Hokkaido Institute of Public Health, Japan; Hopital Cantonal Universitaire de  
973 Geneves, Switzerland; Hopital Charles Nicolle, Tunisia; Hospital Clinic de Barcelona, Spain;  
974 Hospital Universitari Vall d'Hebron, Spain; Houston Department of Health and Human Services,  
975 United States; Hyogo Prefectural Institute of Public Health and Consumer Sciences, Japan;  
976 Ibaraki Prefectural Institute of Public Health, Japan; Illinois Department of Public Health,  
977 United States; Indiana State Department of Health Laboratories, United States; Infectology  
978 Center of Latvia, Latvia; Innlandet Hospital Trust, Division Lillehammer, Department for  
979 Microbiology, Norway; INSA National Institute of Health Portugal, Portugal; Institut National  
980 d'Hygiene, Morocco; Institut Pasteur d'Algerie, Algeria; Institut Pasteur de Dakar, Senegal;  
981 Institut Pasteur de Madagascar, Madagascar; Institut Pasteur in Cambodia, Cambodia; Institut  
982 Pasteur New Caledonia, New Caledonia; Institut Pasteur, France; Institut Pasteur, Saudi Arabia;  
983 Institut Penyelidikan Perubatan, Malaysia; Institute National D'Hygiene, Togo; Institute  
984 of Environmental Science and Research, New Zealand; Institute of Environmental Science  
985 and Research, Tonga; Institute of Epidemiology and Infectious Diseases, Ukraine; Institute  
986 of Epidemiology Disease Control and Research, Bangladesh; Institute of Immunology and  
987 Virology Torlak, Serbia; Institute of Medical and Veterinary Science (IMVS), Australia; Institute  
988 of Public Health, Serbia; Institute of Public Health, Albania; Institute of Public Health,  
989 Montenegro; Institute Pasteur du Cambodia, Cambodia; Instituto Adolfo Lutz, Brazil; Instituto  
990 Conmemorativo Gorgas de Estudios de la Salud, Panama; Instituto de Salud Carlos III, Spain;  
991 Instituto de Salud Publica de Chile, Chile; Instituto Nacional de Enfermedades Infecciosas,  
992 Argentina; Instituto Nacional de Higiene Rafael Rangel, Venezuela, Bolivia; Instituto Nacional  
993 de Laboratorios de Salud (INLASA), Bolivia; Instituto Nacional de Salud de Columbia, Colombia;  
994 Instituto Nacional de Saude, Portugal; Iowa State Hygienic Laboratory, United States; IRSS,  
995 Burkina Faso; Ishikawa Prefectural Institute of Public Health and Environmental Science, Japan;  
996 ISS, Italy; Istanbul University, Turkey; Istituto Superiore di Sanit, Italy; Ivanovsky Research  
997 Institute of Virology RAMS, Russian Federation; Jiangsu Provincial Center for Disease Control  
998 and Prevention, China; John Hunter Hospital, Australia; Kagawa Prefectural Research Institute  
999 for Environmental Sciences and Public Health, Japan; Kagoshima Prefectural Institute for  
1000 Environmental Research and Public Health, Japan; Kanagawa Prefectural Institute of Public  
1001 Health, Japan; Kansas Department of Health and Environment, United States; Kawasaki City  
1002 Institute of Public Health, Japan; Kentucky Division of Laboratory Services, United States;  
1003 Kitakyusyu City Institute of Environmental Sciences, Japan; Kobe Institute of Health, Japan;  
1004 Kochi Public Health and Sanitation Institute, Japan; Kumamoto City Environmental Research

1005 Center, Japan; Kumamoto Prefectural Institute of Public Health and Environmental Science,  
1006 Japan; Kyoto City Institute of Health and Environmental Sciences, Japan; Kyoto Prefectural  
1007 Institute of Public Health and Environment, Japan; Laboratoire National de Sante Publique,  
1008 Haiti; Laboratoire National de Sante, Luxembourg; Laboratrio Central do Estado do Paran,  
1009 Brazil; Laboratorio Central do Estado do Rio de Janeiro, Brazil; Laboratorio de Investigacion /  
1010 Centro de Educacion Medica y Amistad Dominico Japones (CEMADOJA), Dominican Republic;  
1011 Laboratorio De Saude Publico, Macao; Laboratorio de Virologia, Direccion de Microbiologia,  
1012 Nicaragua; Laboratorio de Virus Respiratorio, Mexico; Laboratorio Nacional de Influenza,  
1013 Costa Rica; Laboratorio Nacional De Salud Guatemala, Guatemala; Laboratorio Nacional  
1014 de Virologia, Honduras; Laboratory Directorate, Jordan; Laboratory for Virology, National  
1015 Institute of Public Health, Slovenia; Laboratory of Influenza and ILI, Belarus; LACEN/RS -  
1016 Laboratrio Central de Sade Pblica do Rio Grande do Sul, Brazil; Landspítali - University Hospital,  
1017 Iceland; Lithuanian AIDS Center Laboratory, Lithuania; Los Angeles Quarantine Station, CDC  
1018 Quarantine Epidemiology and Surveillance Team, United States; Louisiana Department of Health  
1019 and Hospitals, United States; Maine Health and Environmental Testing Laboratory, United  
1020 States; Malbran, Argentina; Marshfield Clinic Research Foundation, United States; Maryland  
1021 Department of Health and Mental Hygiene, United States; Massachusetts Department of Public  
1022 Health, United States; Mater Dei Hospital, Malta; Medical Research Institute, Sri Lanka;  
1023 Medical University Vienna, Austria; Melbourne Pathology, Australia; Michigan Department of  
1024 Community Health, United States; Mie Prefecture Health and Environment Research Institute,  
1025 Japan; Mikrobiologisk laboratorium, Sykehuset i Vestfold, Norway; Ministry of Health and  
1026 Population, Egypt; Ministry of Health of Ukraine, Ukraine; Ministry of Health, Bahrain; Ministry  
1027 of Health, Kiribati; Ministry of Health, Lao, People's Democratic Republic; Ministry of Health,  
1028 NIHRD, Indonesia; Ministry of Health, Oman; Minnesota Department of Health, United States;  
1029 Mississippi Public Health Laboratory, United States; Missouri Department. of Health and  
1030 Senior Services, United States; Miyagi Prefectural Institute of Public Health and Environment,  
1031 Japan; Miyazaki Prefectural Institute for Public Health and Environment, Japan; Molde  
1032 Hospital, Laboratory for Medical Microbiology, Norway; Molecular Diagnostics Unit , United  
1033 Kingdom; Monash Medical Centre, Australia; Montana Laboratory Services Bureau, United  
1034 States; Montana Public Health Laboratory, United States; Nagano City Health Center, Japan;  
1035 Nagano Environmental Conservation Research Institute, Japan; Nagoya City Public Health  
1036 Research Institute, Japan; Nara Prefectural Institute for Hygiene and Environment, Japan;  
1037 National Center for Communicable Diseases, Mongolia; National Center for Laboratory and  
1038 Epidemiology, Laos; National Centre for Disease Control (NCDC), Mongolia; National Centre for  
1039 Disease Control and Public Health, Georgia; National Centre for Preventive Medicine, Moldova,  
1040 Republic of; National Centre for Scientific Services for Virology and Vector Borne Diseases, Fiji;  
1041 National Health Laboratory, Japan; National Health Laboratory, Myanmar; National Influenza  
1042 Center French Guiana and French Indies, French Guiana; National Influenza Center, Brazil;  
1043 National Influenza Center, Mongolia; National Influenza Centre for Northern Greece, Greece;  
1044 National Influenza Centre of Iraq, Iraq; National Influenza Lab, Tanzania, United Republic  
1045 of; National Influenza Reference Laboratory, Nigeria; National Insitut of Hygien, Morocco;  
1046 National Institute for Biological Standards and Control (NIBSC), United States; National  
1047 Institute for Communicable Disease, South Africa; National Institute for Health and Welfare,  
1048 Finland; National Institute of Health Research and Development, Indonesia; National Institute

1049 of Health, Korea, Republic of; National Institute of Health, Pakistan; National Institute of  
1050 Hygien, Morocco; National Institute of Hygiene and Epidemiology, Vietnam; National Institute  
1051 of Public Health - National Institute of Hygiene, Poland; National Institute of Public Health,  
1052 Czech Republic; National Institute of Virology, India; National Microbiology Laboratory, Health  
1053 Canada, Canada; National Public Health Institute of Slovakia, Slovakia; National Public Health  
1054 Laboratory, Cambodia; National Public Health Laboratory, Ministry of Health, Singapore,  
1055 Singapore; National Public Health Laboratory, Nepal; National Public Health Laboratory,  
1056 Singapore; National Reference Laboratory, Kazakhstan; National University Hospital, Singapore;  
1057 National Virology Laboratory, Center Microbiological Investigations, Kyrgyzstan; National Virus  
1058 Reference Laboratory, Ireland; Naval Health Research Center, United States; Nebraska Public  
1059 Health Lab, United States; Nevada State Health Laboratory, United States; New Hampshire  
1060 Public Health Laboratories, United States; New Jersey Department of Health and Senior  
1061 Services, United States; New Mexico Department of Health, United States; New York City  
1062 Department of Health, United States; New York Medical College, United States; New York State  
1063 Department of Health, United States; Nicosia General Hospital, Cyprus; Niigata City Institute  
1064 of Public Health and Environment, Japan; Niigata Prefectural Institute of Public Health and  
1065 Environmental Sciences, Japan; Niigata University, Japan; Nordlandssykehuset, Norway; North  
1066 Carolina State Laboratory of Public Health, United States; North Dakota Department of  
1067 Health, United States; Norwegian Institute of Public Health, Norway; Norwegian Institute of  
1068 Public Health, Svalbard and Jan Mayen; Ohio Department of Health Laboratories, United  
1069 States; Oita Prefectural Institute of Health and Environment, Japan; Okayama Prefectural  
1070 Institute for Environmental Science and Public Health, Japan; Okinawa Prefectural Institute  
1071 of Health and Environment, Japan; Oklahoma State Department of Health, United States;  
1072 Ontario Agency for Health Protection and Promotion (OHPP), Canada; Oregon Public  
1073 Health Laboratory, United States; Osaka City Institute of Public Health and Environmental  
1074 Sciences, Japan; Osaka Prefectural Institute of Public Health, Japan; Oslo University Hospital,  
1075 Ullevål Hospital, Dept. of Microbiology, Norway; Ostfold Hospital - Fredrikstad, Dept. of  
1076 Microbiology, Norway; Oswaldo Cruz Institute - FIOCRUZ - Laboratory of Respiratory Viruses  
1077 and Measles (LVRS), Brazil; Papua New Guinea Institute of Medical Research, Papua New  
1078 Guinea; Pasteur Institut of Cote d'Ivoire, Cote d'Ivoire; Pasteur Institute, Influenza Laboratory,  
1079 Vietnam; Pathwest QE II Medical Centre, Australia; Pennsylvania Department of Health,  
1080 United States; Prince of Wales Hospital, Australia; Princess Margaret Hospital for Children,  
1081 Australia; Public Health Laboratory Services Branch, Centre for Health Protection, Hong Kong;  
1082 Public Health Laboratory, Barbados; Puerto Rico Department of Health, Puerto Rico; Qasya  
1083 Diagnostic Services Sdn Bhd, Brunei; Queensland Health Scientific Services, Australia; Refik  
1084 Saydam National Public Health Agency, Turkey; Regent Seven Seas Cruises, United States;  
1085 Royal Victoria Hospital, United Kingdom; Republic Institute for Health Protection, Macedonia,  
1086 the former Yugoslav Republic of; Republic of Nauru Hospital, Nauru; Research Institute for  
1087 Environmental Sciences and Public Health of Iwate Prefecture, Japan; Research Institute of  
1088 Tropical Medicine, Philippines; Rhode Island Department of Health, United States; RIVM  
1089 National Institute for Public Health and Environment, Netherlands; Robert-Koch-Institute,  
1090 Germany; Royal Childrens Hospital, Australia; Royal Darwin Hospital, Australia; Royal Hobart  
1091 Hospital, Australia; Royal Melbourne Hospital, Australia; Russian Academy of Medical Sciences,  
1092 Russian Federation; Rwanda Biomedical Center, National Reference Laboratory, Rwanda; Saga

1093 Prefectural Institute of Public Health and Pharmaceutical Research, Japan; Sagamihara City  
1094 Laboratory of Public Health, Japan; Saitama City Institute of Health Science and Research,  
1095 Japan; Saitama Institute of Public Health, Japan; Sakai City Institute of Public Health,  
1096 Japan; San Antonio Metropolitan Health, United States; Sandringham, National Institute for  
1097 Communicable D, South Africa; Sapporo City Institute of Public Health, Japan; Scientific  
1098 Institute of Public Health, Belgium; Seattle and King County Public Health Lab, United States;  
1099 Sendai City Institute of Public Health, Japan; Servicio de Microbiologia Clinica Universidad de  
1100 Navarra, Spain; Servicio de Microbiologia Complejo Hospitalario de Navarra, Spain; Servicio de  
1101 Microbiologia Hospital Central Universitario de Asturias, Spain; Servicio de Microbiologia Hospital  
1102 Donostia, Spain; Servicio de Microbiologia Hospital Meixoeiro, Spain; Servicio de Microbiologia  
1103 Hospital Miguel Servet, Spain; Servicio de Microbiologia Hospital Ramn y Cajal, Spain; Servicio  
1104 de Microbiologia Hospital San Pedro de Alcantara, Spain; Servicio de Microbiologia Hospital  
1105 Santa Mara Nai, Spain; Servicio de Microbiologia Hospital Universitario de Gran Canaria Doctor  
1106 Negrn, Spain; Servicio de Microbiologia Hospital Universitario Son Espases, Spain; Servicio  
1107 de Microbiologia Hospital Virgen de la Arrixaca, Spain; Servicio de Microbiologia Hospital  
1108 Virgen de las Nieves, Spain; Servicio de Virosis Respiratorias INEI-ANLIS Carlos G. Malbran,  
1109 Argentina; Shiga Prefectural Institute of Public Health, Japan; Shimane Prefectural Institute of  
1110 Public Health and Environmental Science, Japan; Shizuoka City Institute of Environmental  
1111 Sciences and Public Health , Japan; Shizuoka Institute of Environment and Hygiene, Japan;  
1112 Singapore General Hospital, Singapore; Sorlandet Sykehus HF, Dept. of Medical Microbiology,  
1113 Norway; South Carolina Department of Health, United States; South Dakota Public Health  
1114 Lab, United States; Southern Nevada Public Health Lab, United States; Spokane Regional  
1115 Health District, United States; St. Judes Childrens Research Hospital, United States; St. Olavs  
1116 Hospital HF, Dept. of Medical Microbiology, Norway; State Agency, Infectology Center of  
1117 Latvia, Latvia; State of Hawaii Department of Health, United States; State of Idaho Bureau  
1118 of Laboratories, United States; State Research Center of Virology and Biotechnology Vector,  
1119 Russian Federation; Statens Serum Institute, Denmark; Stavanger Universitetssykehus, Avd. for  
1120 Medisinsk Mikrobiologi, Norway; Subdireccion General de Epidemiologia y Vigilancia de la Salud,  
1121 Spain; Subdireccin General de Epidemiologa y Vigilancia de la Salud, Spain; Swedish Institute  
1122 for Infectious Disease Control, Sweden; Swedish National Institute for Communicable Disease  
1123 Control, Sweden; Taiwan CDC, Taiwan; Tan Tock Seng Hospital, Singapore; Tehran University  
1124 of Medical Sciences, Iran; Tennessee Department of Health Laboratory-Nashville, United States;  
1125 Texas Childrens Hospital, United States; Texas Department of State Health Services, United  
1126 States; Thai National Influenza Center, Thailand; Thailand MOPH-U.S. CDC Collaboration  
1127 (IEIP), Thailand; The Nebraska Medical Center, United States; Tochigi Prefectural Institute  
1128 of Public Health and Environmental Science, Japan; Tokushima Prefectural Centre for Public  
1129 Health and Environmental Sciences, Japan; Tokyo Metropolitan Institute of Public Health,  
1130 Japan; Tottori Prefectural Institute of Public Health and Environmental Science, Japan; Toyama  
1131 Institute of Health, Japan; U.S. Air Force School of Aerospace Medicine, United States; U.S.  
1132 Naval Medical Research Unit No.3, Egypt; Uganda Virus Research Institute (UVRI), National  
1133 Influenza Center, Uganda; Universidad de Valladolid, Spain; Universit Cattolica del Sacro  
1134 Cuore, Italy; Universitetssykehuset Nord-Norge HF, Norway; University Malaya, Malaysia;  
1135 University of Florence, Italy; University of Genoa, Italy; University of Ghana, Ghana; University  
1136 of Michigan SPH EPID, United States; University of Parma, Italy; University of Perugia, Italy;

1137 University of Pittsburgh Medical Center Microbiology Lab, United States; University of Sarajevo,  
1138 Bosnia and Herzegovina; University of Sassari, Italy; University of the West Indies, Jamaica;  
1139 University of Vienna, Austria; University of Virginia, Medical Labs/Microbiology, United  
1140 States; University Teaching Hospital, Zambia; UPMC-CLB Dept of Microbiology, United States;  
1141 US Army Medical Research Unit - Kenya (USAMRU-K), GEIS Human Influenza Program,  
1142 Kenya; USAMC-AFRIMS Department of Virology, Cambodia; Utah Department of Health,  
1143 United States; Utah Public Health Laboratory, United States; Utsunomiya City Institute of  
1144 Public Health and Environment Science, Japan; VACSERA, Egypt; Vermont Department of  
1145 Health Laboratory, United States; Victorian Infectious Diseases Reference Laboratory, Australia;  
1146 Virginia Division of Consolidated Laboratories, United States; Wakayama City Institute of  
1147 Public Health, Japan; Wakayama Prefectural Research Center of Environment and Public  
1148 Health, Japan; Washington State Public Health Laboratory, United States; West Virginia  
1149 Office of Laboratory Services, United States; Westchester County Department of Laboratories  
1150 and Research, United States; Westmead Hospital, Australia; WHO National Influenza Centre  
1151 Russian Federation, Russian Federation; WHO National Influenza Centre, National Institute  
1152 of Medical Research (NIMR), Thailand; WHO National Influenza Centre, Norway; Wisconsin  
1153 State Laboratory of Hygiene, United States; Wyoming Public Health Laboratory, United States;  
1154 Yamagata Prefectural Institute of Public Health, Japan; Yamaguchi Prefectural Institute of  
1155 Public Health and Environment, Japan; Yamanashi Institute for Public Health, Japan; Yap  
1156 State Hospital, Micronesia; Yokohama City Institute of Health, Japan; Yokosuka Institute of  
1157 Public Health, Japan
